# Estimating divergence times from DNA sequences

Per Sjödin<sup>\*1</sup>, James McKenna<sup>\*</sup> and Mattias Jakobsson<sup>\*1,†</sup>

<sup>\*</sup>Human Evolution, Department of Organismal Biology, Uppsala University, Uppsala, Sweden, <sup>†</sup>Science for Life Laboratory, Uppsala University, Uppsala, Sweden

**ABSTRACT** The patterns of genetic variation within and among individuals and populations can be used to make inferences about the evolutionary forces that generated those patterns. Numerous population genetic approaches have been developed in order to infer evolutionary history. Here, we present the ‘Two-Two (TT)’ and the ‘Two-Two-outgroup (TTo)’ methods; two closely related approaches for estimating divergence time based in coalescent theory. They rely on sequence data from two haploid genomes (or a single diploid individual) from each of two populations. Under a simple population-divergence model, we derive the probabilities of the possible sample configurations. These probabilities form a set of equations that can be solved to obtain estimates of the model parameters, including population split-times, directly from the sequence data. This transparent and computationally efficient approach to infer population divergence time makes it possible to estimate time scaled in generations (assuming a mutation rate), and not as a compound parameter of genetic drift. Using simulations under a range of demographic scenarios, we show that the method is relatively robust to migration and that the TTo-method can alleviate biases that can appear from drastic ancestral population size changes. We illustrate the utility of the approaches with some examples, including estimating split times for pairs of human populations as well as providing further evidence for the complex relationship among Neandertals and Denisovans and their ancestors.

**KEYWORDS** Effective population size; Divergence time; Population divergence; Human evolution

## Background

Many population genetic inference approaches compare levels of genetic variation within and across genomes, individuals and/or populations in order to uncover their evolutionary history. A multitude of demographic inference methods have been developed in order to capitalize on the wealth of information that comes with the availability of full genomes from multiple individuals (see [Schraiber and Akey 2015](#), for a review).

The sheer scale and complexity of whole genome data sets poses its own challenge for making inference of population demographic parameters. A common approach for inference has been to compare the observed data, often summarized in some statistic, to simulated data that can be generated under a range of population-genetic models. Building on this idea and combined

with a rejection algorithm, Approximate Bayesian Computation (ABC, [Beaumont et al. 2002](#); [Cornuet et al. 2014](#); [Tavaré et al. 1997](#); [Pudlo et al. 2016](#)) has proven to be one useful tool for both model choice and parameter estimation. However, the problem of choosing which models to test is not trivial for most inference approaches, including ABC, as the set of models to choose from is very large.

In parallel, there have been recent developments in methods that use haplotype information. A challenge for these approaches is how to model the dependence of genealogies along a sequence. One solution has been to approximate the full ancestral recombination graph, a method used in PSMC ([Li and Durbin 2011](#)) and similar approaches ([Schiffels and Durbin 2014](#); [Terhorst et al. 2017](#); [Kelleher et al. 2019](#); [Speidel et al. 2019](#); [Wang et al. 2020](#)).

Another strategy has been to rely on relatively short genetic fragments located sufficiently far away from each other to be able to assume linkage equilibrium between loci, combined with absolute linkage (absence of recombination) within each locus (e.g. [Gronau et al. 2011](#)). Both these approaches typically lead to set-ups that cannot be solved analytically and often rely on computationally heavy, advanced statistical methods in order

doi: 10.1534/genetics.XXX.XXXXXX

Manuscript compiled: Thursday 15<sup>th</sup> October, 2020

Human Evolution, Department of Organismal Biology, Uppsala University, Norbyvägen 18C, 75 236 Uppsala, Sweden. per.sjodin@ebc.uu.se, mattias.jakobsson@ebc.uu.se

1 to estimate parameters (but see [Gattepaille et al. 2016](#); [Lohse](#)  
2 [et al. 2016](#)). A related strategy is to assume independence among  
3 sites, using a composite likelihood framework ([Gutenkunst et al.](#)  
4 [2009](#); [Excoffier et al. 2013](#)). From this assumption, the observed  
5 variables (*i.e.* frequency spectra) do not depend on the full dis-  
6 tribution of genealogical branch lengths, they are functions only  
7 of the expected branch lengths ([Griffiths and Tavaré 1998](#); [Chen](#)  
8 [2012](#)). This observation greatly simplifies the probability computa-  
9 tions. To the extent that closed-form solutions can be obtained,  
10 the assumption of independence between sites also leads to infer-  
11 ence tools that are easier to integrate with other methods, and  
12 can provide useful insights into underlying processes ([Beichman](#)  
13 [et al. 2017](#); [Terhorst et al. 2017](#)). Conversely, a disadvantage of  
14 assuming independence between sites is that only information  
15 concerning the expected values can be obtained, rather than the  
16 full distributions of stochastic variables. For small samples, an al-  
17 ternative is to derive closed form expressions for the probability  
18 of observing particular configurations of variants in simple di-  
19 vergence models, including the isolation-with-migration model  
20 ([Wakeley and Hey 1997](#); [Wilkinson-Herbots 2008](#); [Chen 2012](#)).  
21 [Lohse et al. \(2011, 2016\)](#) showed that more generally, the proba-  
22 bility of observing a particular variant configuration can be  
23 obtained from a generating function of genealogical branches.  
24 Assuming independence among sequence-blocks, [Lohse et al.](#)  
25 [\(2011, 2016\)](#) outlined an approach for computing the likelihood  
26 under various demographic models and sampling schemes.

Regardless of whether independence between sites is as-  
sumed or not, all of these methods can be useful for inferring  
the time of divergence between two populations. Examples of  
simple and direct methods used to estimate population diver-  
gence times include: [Green et al. \(2010\)](#); [Gutenkunst et al. \(2009\)](#);  
[Wakeley \(2009\)](#); [Schlebusch et al. \(2012\)](#); [Theunert and Slatkin](#)  
[\(2018\)](#). These methods build on the principle of genetic drift  
accumulating as a function of effective population size and num-  
ber of generations. Following a population backwards in time,  
and using that the accumulated drift at generation  $t$  is,

$$\sum_{i=1}^t \frac{1}{2N(i)},$$

27 where  $N(i)$  is the (effective) number of individuals at generation  
28  $i$ , the divergence time is then the number of generations required  
29 to generate the estimated drift. Such estimates are typically not  
30 dependent on knowing the mutation rate but some assumptions  
31 regarding  $N(i)$  is required, either by assuming a fixed effective  
32 population size or depending on an estimated function of  $N(i)$ .  
33

Alternatively, one can base the divergence time estimate on  
34 an assumed mutation rate (e.g. [Wakeley and Hey 1997](#); [Chen](#)  
35 [2012](#); [Pickrell et al. 2012](#)). By assuming independence among  
36 sites, in a two-population divergence model (without migration),  
37 the probability of observed sample configurations (summarized  
38 as the full SFS, including invariable sites) can be derived ana-  
39 lytically. Using a likelihood framework, we can then estimate  
40 parameters of interest in the divergence model. Here we present  
41 two simple approaches based on picking two gene copies from  
42 each of two populations: the ‘Two-Two’ (TT) method, which was  
43 briefly introduced in [Schlebusch et al. \(2017\)](#) and the ‘Two-Two-  
44 outgroup’ (TTo) method. These are sufficiently simple to allow  
45 for analytical solutions giving closed formulas for the estimates  
46 of the model parameters based on the counts of different sample  
47 configurations. Specifically, we can directly estimate population  
48 divergence time in generations, an estimate which is indepen-  
49 dent of genetic drift and effects of varying population size since

the model is parametrized with both a drift parameter and a  
time parameter.

## Observed data

For the purpose of investigating the demographic relationship  
between two populations denoted population 1 and popula-  
tion 2, assume that two gene copies have been sampled from  
each population. For bi-allelic sites, assume that the ancestral  
(denoted ‘0’) and the derived variant (denoted ‘1’) is known.  
The number of derived alleles in a sample from population 1  
combined with the number of derived alleles in a sample from  
population 2 is referred to as the joint frequency spectra. Follow-  
ing [Chen \(2012\)](#), a sample configuration of  $k_1$  derived variants  
in a sample of size  $n_1$  from population 1 and  $k_2$  derived variants  
in a sample of size  $n_2$  from population 2 can then be denoted as  
 $S_{n_1, n_2}(k_1, k_2)$ . In our set up,  $n_1 = n_2 = 2$  and  $k_1, k_2$  are either 0, 1  
or 2, and there are 9 possible sample configurations, which are  
presented in Table 1. The observed number of sites with sample  
configuration  $O_{i,j}$  will be denoted by  $m_{i,j}$  and the total number  
of investigated sites by  $m_{tot}$ .

**Table 1** Notation for the number of sites with 0, 1, or 2 derived  
variants in the sample from population 1 and the sample from  
population 2.

|             | 0 in pop. 2 | 1 in pop. 2 | 2 in pop. 2 |
|-------------|-------------|-------------|-------------|
| 0 in pop. 1 | $O_{0,0}$   | $O_{0,1}$   | $O_{0,2}$   |
| 1 in pop. 1 | $O_{1,0}$   | $O_{1,1}$   | $O_{1,2}$   |
| 2 in pop. 1 | $O_{2,0}$   | $O_{2,1}$   | $O_{2,2}$   |

## Theory

We study a general population divergence model where the  
population-branch leading to population 1 and the population-  
branch leading to population 2 merge (backwards in time) to  
become the ancestral population. The model makes no assump-  
tions regarding population size and/or population structure  
changes in the daughter populations. The model assumes no  
migration between the two daughter populations and that these  
merge into a panmictic ancestral population.

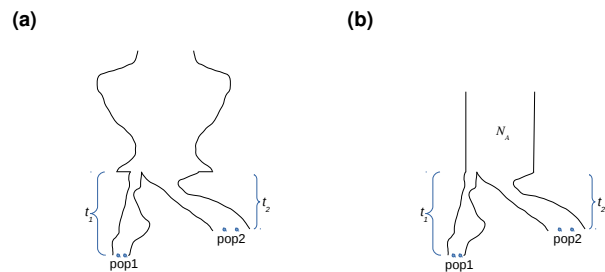

**Figure 1** Different assumptions for population divergence  
models (a) panmictic ancestral population, and (b) constant  
ancestral population.

We use the following notation, with time measured in number

of generations:

- $t_1$  : time to split for pop. 1,
- $t_2$  : time to split for pop. 2,
- $\alpha_1$  : prob. of two lineages in pop. 1 not coalescing before  $t_1$ ,
- $\alpha_2$  : prob. of two lineages in pop. 2 not coalescing before  $t_2$ ,
- $\nu_1$  : expected time to coal. in pop. 1 given coal. before  $t_1$ ,
- $\nu_2$  : expected time to coal. in pop. 2 given coal. before  $t_2$ .

**Table 2** Conditional probabilities.

|           | $H_1 \wedge H_2$                      | $H_1 \wedge \neg H_2$                 | $\neg H_1 \wedge H_2$                 | $\neg H_1 \wedge \neg H_2$    |
|-----------|---------------------------------------|---------------------------------------|---------------------------------------|-------------------------------|
| $O_{1,0}$ | $2\mu\nu_1$                           | $2\mu\nu_1$                           | $\frac{2a_{31}}{3} + 2\mu t_1$        | $\frac{a_{41}}{2} + 2\mu t_1$ |
| $O_{0,1}$ | $2\mu\nu_2$                           | $\frac{2a_{31}}{3} + 2\mu t_2$        | $2\mu\nu_2$                           | $\frac{a_{41}}{2} + 2\mu t_2$ |
| $O_{2,0}$ | $\frac{a_{21}}{2} + \mu(t_1 - \nu_1)$ | $\frac{a_{31}}{3} + \mu(t_1 - \nu_1)$ | $\frac{a_{32}}{3}$                    | $\frac{a_{42}}{6}$            |
| $O_{0,2}$ | $\frac{a_{21}}{2} + \mu(t_2 - \nu_2)$ | $\frac{a_{32}}{3}$                    | $\frac{a_{31}}{3} + \mu(t_2 - \nu_2)$ | $\frac{a_{42}}{6}$            |
| $O_{1,1}$ | 0                                     | 0                                     | 0                                     | $\frac{2a_{42}}{3}$           |
| $O_{2,1}$ | 0                                     | $\frac{2a_{32}}{3}$                   | 0                                     | $\frac{a_{43}}{2}$            |
| $O_{1,2}$ | 0                                     | 0                                     | $\frac{2a_{32}}{3}$                   | $\frac{a_{43}}{2}$            |

$i = 4$  as follows:

$$a_{21} = P(A_2 = 1) = \sum_{i=0}^4 P(A_2 = 1 | A_4 = i) a_{4i} = \frac{1}{2} a_{41} + \frac{2}{3} a_{42} + \frac{1}{2} a_{43}$$

$$a_{31} = P(A_3 = 1) = \frac{3}{4} a_{41} + \frac{1}{2} a_{42}$$

$$a_{32} = P(A_3 = 2) = \frac{1}{2} a_{42} + \frac{3}{4} a_{43}.$$

These equations together with Table 2 allows us to derive the probabilities for the different sample configurations. For instance:

$$\begin{aligned} P(O_{1,0}) &= (1 - \alpha_1)(1 - \alpha_2)2\mu\nu_1 + (1 - \alpha_1)\alpha_2 2\mu\nu_1 \\ &\quad + \alpha_1(1 - \alpha_2) \left( \frac{2}{3} a_{31} + 2\mu t_1 \right) \\ &\quad + \alpha_1 \alpha_2 \left( \frac{1}{2} a_{41} + 2\mu t_1 \right) \\ &= 2(1 - \alpha_1)\mu\nu_1 + 2\alpha_1 \left( \mu t_1 + \frac{1}{4} b_1 \right) + \frac{1}{3} \alpha_1(1 - \alpha_2) b_2 \end{aligned}$$

where  $b_i = a_{4i} = P(A_4 = i)$ .

Using the same strategy for the derivation of the other six probabilities, we obtain the probabilities for all seven sample configurations in Table 2. Writing  $p_{i,j} = P(O_{i,j})$  for brevity, these are

$$p_{1,0} = 2(1 - \alpha_1)\mu\nu_1 + 2\alpha_1 \left( \mu t_1 + \frac{1}{4} b_1 \right) + \frac{1}{3} \alpha_1(1 - \alpha_2) b_2$$

$$p_{0,1} = 2(1 - \alpha_2)\mu\nu_2 + 2\alpha_2 \left( \mu t_2 + \frac{1}{4} b_1 \right) + \frac{1}{3} (1 - \alpha_1)\alpha_2 b_2$$

$$\begin{aligned} p_{2,0} &= (1 - \alpha_1) \left( \mu t_1 + \frac{1}{4} b_1 \right) - (1 - \alpha_1)\mu\nu_1 \\ &\quad + \frac{1}{6} (2 - \alpha_1 - \alpha_2 + \alpha_1 \alpha_2) b_2 + \frac{1}{4} (1 - \alpha_2) b_3 \end{aligned}$$

$$\begin{aligned} p_{0,2} &= (1 - \alpha_2) \left( \mu t_2 + \frac{1}{4} b_1 \right) - (1 - \alpha_2)\mu\nu_2 \\ &\quad + \frac{1}{6} (2 - \alpha_1 - \alpha_2 + \alpha_1 \alpha_2) b_2 + \frac{1}{4} (1 - \alpha_1) b_3 \end{aligned}$$

$$p_{1,1} = \frac{2}{3} \alpha_1 \alpha_2 b_2$$

$$p_{2,1} = \frac{1}{3} (1 - \alpha_1)\alpha_2 b_2 + \frac{1}{2} \alpha_2 b_3$$

$$p_{1,2} = \frac{1}{3} \alpha_1(1 - \alpha_2) b_2 + \frac{1}{2} \alpha_1 b_3 \quad (1)$$

Furthermore, if we assume a (indefinitely) panmictic ancestral population (figure 1a), we define

$$T_{4i}$$

In addition to the drift parameters  $\alpha_1$  and  $\alpha_2$ , the parameters  $\nu_1$  and  $\nu_2$  are needed because two branches with the same time-length and the same drift can have different distributions of coalescence times. To illustrate, a linearly growing population that starts with size  $N$  and ends with size  $2N$  will have the same drift as a shrinking population that starts with size  $2N$  and ends with size  $N$  but they will not have the same distribution of coalescent times within that interval. These parameters also cover cases when the daughter populations are not panmictic. A similar parametrization can be found, for instance, in Rogers and Bohlender (2014).

The composite likelihood assumption of independence between sites implies that the probability of a mutation on a specific branch in a genealogy is the expected length of that branch (given a demographic model) multiplied by the mutation rate. We denote the mutation rate per site and generation by  $\mu$ , assume independence between sites, and an infinite sites model.

We define the following events for the two sampled lineages for each population:

$H_1$  : a coalescence in population 1 before  $t_1$ ;  $P(H_1) = 1 - \alpha_1$

$H_2$  : a coalescence in population 2 before  $t_2$ ;  $P(H_2) = 1 - \alpha_2$ .

With  $2 \leq k \leq 4$  lineages surviving to enter the ancestral population (depending on whether coalescence events have occurred in the daughter populations), we define  $A_k$  to be the number of derived variants in a sample of size  $k$  drawn at the split time in the ancestral population and write  $a_{ki} = P(A_k = i)$ . To illustrate how the probabilities of the sample configurations are derived, we can take an example conditional on no coalescent event in population 1 and a coalescent event in population 2 (the event  $\neg H_1 \wedge H_2$ ). There are then 3 lineages entering the ancestral population. These lineages constitute a sample of size 3 from the ancestral population. Sample configuration  $O_{1,0}$  will then be observed with probability  $(2/3)a_{31}$  (the ancestral variant has to be assigned to the lineage entering population 2; an event with probability  $2/3$ ) plus the probability that a mutation occurs on either lineage entering population 1 during the time interval  $t_1$ . The probability that a mutation hits a branch of length  $t_1$  is  $\mu t_1$ , and the probability that this happens *and* that the derived variant already exists in the ancestral population can be ignored as it requires two mutational events at the same site. Thus, conditional on  $\neg H_1 \wedge H_2$ ,  $P(O_{1,0}) = (2/3)a_{31} + 2\mu t_1$ . The same reasoning can be applied to derive the conditional probabilities for all 7 (polymorphic) sample configurations and these are shown in Table 2.

Since a sub-sample of size  $n$  randomly drawn from a larger sample of size  $n + k$  has the same distribution as a sample of size  $n$  drawn directly from the population, we can reduce the number of parameters by replacing all  $a_{ij}$  with  $i < 4$  using  $a_{ij}$ -terms with

to be the number of generations a coalescent process that starts with 4 lineages at the (most recent) base of the ancestral population spends with  $i$  lineages, so that  $T_{mrca} = T_{44} + T_{43} + T_{42}$ . Then (see appendix)

$$\begin{aligned} b_1 &= P(A_4 = 1) = \frac{2}{3}\mu E[T_{42}] + 2\mu E[T_{43}] + 4\mu E[T_{44}], \\ b_2 &= P(A_4 = 2) = \frac{2}{3}\mu E[T_{42}] + \mu E[T_{43}], \\ b_3 &= P(A_4 = 3) = \frac{2}{3}\mu E[T_{42}]. \end{aligned}$$

Writing  $\tau_i = \mu E[T_{4i}]$ , and replacing the  $b_i$  with their respective expression in terms of  $\tau_i$ , the probabilities for the different sample configurations can be expressed as:

$$\begin{aligned} p_{1,0} &= 2(1 - \alpha_1)\mu\nu_1 + 2\alpha_1(\mu t_1 + \tau_4) \\ &\quad + \frac{1}{9}\alpha_1(4 - \alpha_2)(2\tau_2 + 3\tau_3) - \frac{1}{3}\alpha_1\tau_2 \\ p_{0,1} &= 2(1 - \alpha_2)\mu\nu_2 + 2\alpha_2(\mu t_2 + \tau_4) \\ &\quad + \frac{1}{9}(4 - \alpha_1)\alpha_2(2\tau_2 + 3\tau_3) - \frac{1}{3}\alpha_2\tau_2 \\ p_{2,0} &= (1 - \alpha_1)(\mu t_1 + \tau_4 - \mu\nu_1) \\ &\quad + \frac{1}{18}(5 - 4\alpha_1 - \alpha_2 + \alpha_1\alpha_2)(2\tau_2 + 3\tau_3) + \frac{1}{6}(\alpha_1 - \alpha_2)\tau_2 \\ p_{0,2} &= (1 - \alpha_2)(\mu t_2 + \tau_4 - \mu\nu_2) \\ &\quad + \frac{1}{18}(5 - \alpha_1 - 4\alpha_2 + \alpha_1\alpha_2)(2\tau_2 + 3\tau_3) + \frac{1}{6}(\alpha_2 - \alpha_1)\tau_2 \\ p_{1,1} &= \frac{2}{9}\alpha_1\alpha_2(2\tau_2 + 3\tau_3) \\ p_{2,1} &= \frac{1}{9}\alpha_2(1 - \alpha_1)(2\tau_2 + 3\tau_3) + \frac{1}{3}\alpha_2\tau_2 \\ p_{1,2} &= \frac{1}{9}\alpha_1(1 - \alpha_2)(2\tau_2 + 3\tau_3) + \frac{1}{3}\alpha_1\tau_2 \\ p_{0,0} + p_{2,2} &= 1 - \sum_{0 < i+j < 4} p_{i,j} \end{aligned} \quad (2)$$

These 8 equations point to two challenges: i) it is not possible to completely separate  $\tau_4$  from divergence times due to its co-occurrence with  $\mu t_1$  and  $\mu t_2$ , ii) disregarding  $\tau_4$ , it is still an under-determined set of equations with 8 parameters but only 7 equations/degrees of freedom ( $p_{0,0} + p_{2,2} = 1 - \sum_{0 < i+j < 4} p_{i,j}$ ). It can be tempting to reduce the number of parameters by setting  $t_1 = t_2$ , but because (from equations 1 above)

$$\mu \{t_1 - t_2\} = \frac{1}{2}(p_{1,0} - p_{0,1}) + (p_{2,0} - p_{0,2}) + \frac{1}{2}(p_{2,1} - p_{1,2}),$$

1 specifying  $t_1 = t_2$  would add additional dependence between  
2 the equations. Although this will decrease the number of par-  
3 ameters, it also decreases the number of independent equations.  
4 Furthermore, allowing for separate divergence times along the  
5 two branches is a valuable asset; not only does it allow the frame-  
6 work to be applicable for temporally structured samples, but  
7 separate estimates for each branch can be useful more generally.  
8 In fact, it turns out that the divergence time estimate based on  
9 the population branch represented by a modern-day individual  
10 alleviates the potential issue of residual ancient DNA specific  
11 properties (DNA degradation, sequencing errors, mapping er-  
12 rors) that could impact divergence time estimates (see below).  
13 In contrast, for contemporaneous samples, divergence time es-  
14 timates should be the same along the two branches (assuming  
15 neutrality and the same mutation rate and generation time along  
16 the two branches).

The challenges noted above can be dealt with either by as-  
suming a constant ancestral population size (the "TT"-method)  
or by using an outgroup to increase the number of equations  
(the "TTo"-method).

### Assuming a constant ancestral population size ("TT")

Assuming a constant ancestral population size  $N_A$  reduces the number of parameters in the model (figure 1b), so that  $E[T_{4k}] = 2N_A/(k(k-1))$  and (with  $\theta = \mu N_A$ )  $\tau_2 = \theta$ ,  $\tau_3 = \theta/3$  and  $\theta = \tau_4/6$ . Then the probabilities in equations (2) simplify as

$$\begin{aligned} p_{1,0} &= 2\alpha_1 T_1 + 2(1 - \alpha_1)V_1 + \frac{1}{3}\alpha_1(4 - \alpha_2)\theta \\ p_{0,1} &= 2\alpha_2 T_2 + 2(1 - \alpha_2)V_2 + \frac{1}{3}\alpha_2(4 - \alpha_1)\theta \\ p_{2,0} &= (1 - \alpha_1)(T_1 - V_1) + \frac{1}{6}(6 - 4\alpha_1 - 2\alpha_2 + \alpha_1\alpha_2)\theta \\ p_{0,2} &= (1 - \alpha_2)(T_2 - V_2) + \frac{1}{6}(6 - 2\alpha_1 - 4\alpha_2 + \alpha_1\alpha_2)\theta \\ p_{1,1} &= \frac{2}{3}\alpha_1\alpha_2\theta \\ p_{2,1} &= \frac{1}{3}(2 - \alpha_1)\alpha_2\theta \\ p_{1,2} &= \frac{1}{3}(2 - \alpha_2)\alpha_1\theta \end{aligned}$$

With

$$\begin{aligned} T_1 &= \mu t_1 \\ T_2 &= \mu t_2 \\ V_1 &= \mu\nu_1 \\ V_2 &= \mu\nu_2 \end{aligned}$$

We set  $\frac{m_{ij}}{m_{tot}} = p_{ij}$  and solve for the parameters (and note that this guarantees that they are also maximum likelihood estimates (Doob 1934; Wald 1949) to obtain:

$$\begin{aligned} \hat{\alpha}_1 &= \frac{2m_{1,1}}{2m_{2,1} + m_{1,1}} \\ \hat{\alpha}_2 &= \frac{2m_{1,1}}{2m_{1,2} + m_{1,1}} \\ \hat{\theta} &= \frac{1}{m_{tot}} \frac{3(2m_{2,1} + m_{1,1})(2m_{1,2} + m_{1,1})}{8m_{1,1}} \\ \hat{T}_1 &= \frac{1}{m_{tot}} \left( \frac{m_{1,0}}{2} + m_{2,0} - \frac{(2m_{2,1} + m_{1,1})(6m_{1,2} + m_{1,1})}{8m_{1,1}} \right) \\ \hat{T}_2 &= \frac{1}{m_{tot}} \left( \frac{m_{0,1}}{2} + m_{0,2} - \frac{(6m_{2,1} + m_{1,1})(2m_{1,2} + m_{1,1})}{8m_{1,1}} \right) \\ \hat{V}_1 &= \frac{1}{m_{tot}} \left( \frac{m_{1,0} + m_{1,2}}{2} - m_{1,1} \frac{2m_{2,0} - m_{1,2}}{2m_{2,1} - m_{1,1}} \right) \\ \hat{V}_2 &= \frac{1}{m_{tot}} \left( \frac{m_{0,1} + m_{2,1}}{2} - m_{1,1} \frac{2m_{0,2} - m_{2,1}}{2m_{1,2} - m_{1,1}} \right). \end{aligned} \quad (3)$$

These equations are referred to as the "TT"-method in Schlebusch *et al.* (2017) where, in order to get the divergence time in years we used  $G = 30$  and  $\mu = 1.25 \times 10^{-8}$  in

$$\hat{t}_i = \frac{G}{\mu} \hat{T}_i \quad (4)$$

where  $G$  is the length of a generation.

1 Note also that if sequencing errors or DNA-degradation  
2 mainly result in additional singletons, then errors in the sample  
3 from population 1 only affects  $m_{1,0}$  and thus only  $\hat{T}_1$  and  $\hat{V}_1$   
4 ( $m_{1,0}$  occurs exclusively in the equations for estimating  $T_1$  and  
5  $V_1$ ).

### 6 **Adding an outgroup ('TTo')**

The equations (1) are useful for data (including SNP-genotype data) where the derived variant at each site has been ascertained in a population that branched off prior to the investigated population split. Such data will ensure that derived variants in the studied sample will be older than the split so that there are no new mutations occurring in the branches. In such a case,  $\mu t_1$ ,  $\mu t_2$ ,  $\mu v_1$  and  $\mu v_2$  can all be set to 0 in the equations 1 above, resulting in a new set of equations (see appendix) that can be solved for the  $\alpha$ 's to get

$$\hat{\alpha}_1^* = 2 \frac{m_{1,0}^* + m_{1,2}^* + m_{1,1}^*}{2(m_{1,0}^* + 2m_{2,0}^* + m_{2,1}^*) + m_{1,1}^*}$$

$$\hat{\alpha}_2^* = 2 \frac{m_{0,1}^* + m_{2,1}^* + m_{1,1}^*}{2(m_{0,1}^* + 2m_{0,2}^* + m_{1,2}^*) + m_{1,1}^*}.$$

where \* indicates that these are the corresponding parameters and sample configuration counts conditional on ascertainment in an outgroup.

With this ascertainment procedure it is important that the population used to ascertain the SNPs represents a true outgroup to our studied populations and that the populations satisfy an assumption of bifurcating topology (or "tree-ness"). To validate such an assumption we can set up tests of tree-ness, since if  $\mu t_1 = \mu t_2 = \mu v_1 = \mu v_2 = 0$ , then the test statistics

$$Y_1 = \frac{2m_{1,0}^* + m_{1,1}^*}{2m_{0,1}^* + m_{1,1}^*} - \frac{2m_{1,2}^* + m_{1,1}^*}{2m_{2,1}^* + m_{1,1}^*} \quad (5)$$

$$Y_2 = \frac{(m_{1,0}^* - m_{0,1}^*) + 2(m_{2,0}^* - m_{0,2}^*) + (m_{2,1}^* - m_{1,2}^*)}{m_{tot}^*} \quad (6)$$

7 should be 0 (see appendix, where it is also shown that  $Y_2$  is  
8 closely related to the D-statistic, [Green et al. 2010](#)).

The estimates  $\hat{\alpha}_1^*$  and  $\hat{\alpha}_2^*$  of  $\alpha_1$  and  $\alpha_2$  together with the equations in (2) can furthermore be used to obtain estimates of

$$\hat{\tau}_2^* = \frac{1}{m_{tot}} \frac{3}{2} \left( \frac{2m_{2,1} + m_{1,1}}{\hat{\alpha}_2^*} - \frac{m_{1,1}}{\hat{\alpha}_1^* \hat{\alpha}_2^*} \right)$$

$$= \frac{1}{m_{tot}} \frac{3}{2} \left( \frac{2m_{1,2} + m_{1,1}}{\hat{\alpha}_1^*} - \frac{m_{1,1}}{\hat{\alpha}_1^* \hat{\alpha}_2^*} \right)$$

$$\hat{\tau}_3^* = \frac{1}{m_{tot}} \left( \frac{5}{2} \frac{m_{1,1}}{\hat{\alpha}_1^* \hat{\alpha}_2^*} - \frac{2m_{2,1} + m_{1,1}}{\hat{\alpha}_2^*} \right)$$

$$= \frac{1}{m_{tot}} \left( \frac{5}{2} \frac{m_{1,1}}{\hat{\alpha}_1^* \hat{\alpha}_2^*} - \frac{2m_{1,2} + m_{1,1}}{\hat{\alpha}_1^*} \right)$$

$$\hat{B}_1^* = \frac{1}{m_{tot}} \left( \frac{m_{1,0}}{2} + m_{2,0} + \frac{m_{2,1}}{2} - \frac{5 - \hat{\alpha}_1^* \hat{\alpha}_2^*}{\hat{\alpha}_1^* \hat{\alpha}_2^*} \frac{m_{1,1}}{4} \right)$$

$$\hat{B}_2^* = \frac{1}{m_{tot}} \left( \frac{m_{0,1}}{2} + m_{0,2} + \frac{m_{1,2}}{2} - \frac{5 - \hat{\alpha}_1^* \hat{\alpha}_2^*}{\hat{\alpha}_1^* \hat{\alpha}_2^*} \frac{m_{1,1}}{4} \right)$$

$$\hat{V}_1^* = \frac{1}{m_{tot}} \left( \frac{m_{1,0}}{2} - \hat{\alpha}_1^* \frac{m_{2,0}}{1 - \hat{\alpha}_1^*} + \frac{m_{1,2}}{2(1 - \hat{\alpha}_1^*)} \right)$$

$$\hat{V}_2^* = \frac{1}{m_{tot}} \left( \frac{m_{0,1}}{2} - \hat{\alpha}_2^* \frac{m_{0,2}}{1 - \hat{\alpha}_2^*} + \frac{m_{2,1}}{2(1 - \hat{\alpha}_2^*)} \right) \quad (7)$$

with

$$B_1 = \mu t_1 + \tau_4$$

$$B_2 = \mu t_2 + \tau_4.$$

Note the two alternative estimates (one using  $m_{2,1}$  and one using  $m_{1,2}$ ) for  $\tau_3$  and  $\tau_2$  and we take the average of these in estimates below.

Based on the obtained estimates of  $\tau_2$  and  $\tau_3$ , we can attempt to approximate  $\tau_4$  as a combination of  $\tau_2$  and  $3\tau_3$ . In a constant population,  $E[T_{43}]/E[T_{42}] = 1/3$  and  $E[T_{44}]/E[T_{43}] = 1/2$  or

$$\frac{\tau_4}{\tau_3} = \frac{E[T_{44}]}{E[T_{43}]} = \frac{3}{2} \frac{E[T_{43}]}{E[T_{42}]} = \frac{3}{2} \frac{\tau_3}{\tau_2}.$$

For this reason we propose to approximate  $\tau_4/\tau_3$  as  $(3/2)x$  where  $x$  is the estimated ratio of  $\tau_3/\tau_2$ . This leads to

$$\hat{\tau}_4^* = \frac{3}{2} \frac{(\hat{\tau}_3^*)^2}{\hat{\tau}_2^*}$$

to get

$$\hat{T}_i^* = \hat{B}_i^* - \frac{3}{2} \frac{(\hat{\tau}_3^*)^2}{\hat{\tau}_2^*}. \quad (8)$$

We refer to this approach to estimate divergence time as "TTo" (as in "TT outgroup").

### 14 **Picking two gene copies from population 1 and one gene copy from population 2**

The method so far described can be seen as an expansion of the simpler case of picking two gene copies from one population, and only one gene copy from the other population. This simpler set-up can be useful, for instance, when dealing with low coverage genome data (e.g. ancient DNA sequence data). With this simpler approach, divergence time estimation needs an outgroup (only assuming a constant population size is not sufficient to solve the equations in this case). This 2 plus 1 approach does, however, provide reliable estimates of branch specific genetic drift (under often reasonable demographic assumptions, see appendix and [Wakeley 2009](#); [Schlebusch et al. 2012](#); [Skoglund et al. 2011](#)).

### 28 **Simulations and comparison to GPhoCS**

The model underlying the TT method assumes a panmictic ancestral population of constant size prior to the split, and no gene-flow between populations after the split. While common to many coalescent-based approaches, such assumptions are rarely realistic for natural populations, and it is increasingly evident that mis-specification of an overly simplistic model may lead to substantially biased parameter estimates ([Gronau et al. 2011](#); [Mazet et al. 2016](#); [Orozco 2016](#)).

Here we investigate the robustness of the TT-method parameter estimation against violation of the basic model assumptions (equations in 3). We compare its performance under these conditions against an alternative method for parameter inference, GPhoCS ([Gronau et al. 2011](#)). The analytical TT method and the Bayesian inference method GPhoCS are located to some degree at opposite ends of the statistical inference spectrum; instead of relying on independent single bi-allelic sites, GPhoCS assumes complete linkage between individual sites at a genetic locus (typically 10 kb), but independence between these loci. It should

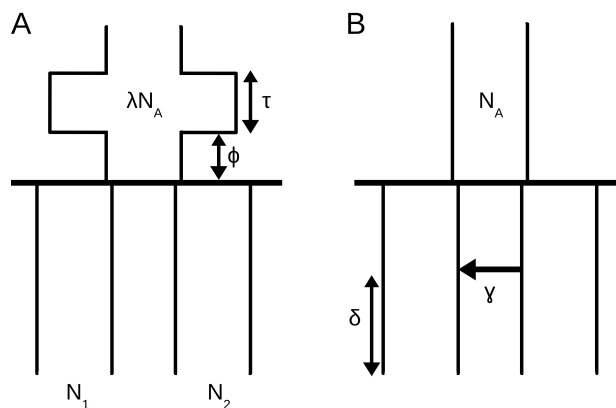

**Figure 2** The two general demographic models used to simulate data for testing robustness of TT method, with (A) changes in ancestral population size, and (B) variation in proportion and timing of migration between branches since a population split.

be noted that GPhoCS is capable of estimating parameters under more complicated demographic models than the simple split model we study here. In particular, GPhoCS allows users to specify migration rates and define migration bands between populations, such that it does not share the TT method assumption of no gene-flow occurring between populations after the population split. For this reason, the effect of migration on parameter estimation was investigated only for the TT method.

The software MS (Hudson 2002) was used to generate polymorphic datasets using a standard coalescent algorithm under a variety of demographic scenarios. The effects of changes in ancestral population size (figure 2A) and migration between branches since the split (figure 2B) were investigated. In each model, the ancestral population size,  $N_A$ , was fixed at 34,000, corresponding to 17,000 diploid individuals. This value is in line with recent estimates of African ancestral effective population size approximately 1 million years ago (Li and Durbin 2011; Schiffels and Durbin 2014; Schlebusch *et al.* 2017). MS scales time by  $4N_e$ , and simulations were constructed with true split times of 10,000 and 1500 generations. Assuming a generation time of 30 years this equates to split times of 300,000 and 45,000 years respectively. These were chosen to keep simulations relevant to the findings of previous work where the deepest split among human groups was estimated at  $>260,000$  years (Schlebusch *et al.* 2017), together with more recent divergence events.

MS generates samples assuming  $\theta = 4N_1\mu$ , where  $N_1$  is the diploid population size of population 1, and  $\mu$  is the neutral mutation rate. Mutation rates vary across the human genome and estimates vary depending on the method used (Sally and Durbin 2012). Li and Durbin (2011) calculated a human neutral mutation rate of  $2.5 \times 10^{-8}$  per generation (assuming 25 years per generation), whilst recent consensus suggests a lower rate of  $1.25 \times 10^{-8}$  per base pair per generation is more accurate (Moorjani *et al.* 2016). The latter is the mutation rate used across all simulations. Results were filtered such that only those simulations resulting in all sample configurations represented by  $> 10,000$  sites were used in subsequent analyses.

The Bayesian inference method GPhoCS is based on likelihood estimation and in order to allow adequate convergence of parameter estimates, a burn-in period of 100,000 iterations was used when applied to MS simulated data.

### The effect of varying ancestral population size

In simulating the demographic scenario shown in figure 2A, populations 1 and 2 are constant backwards in time, but not (necessarily) equal in size; each population size is independently drawn from a uniform distribution between 170 and 1,700,000 diploid individuals. A total of 1000 of such demographies were generated. Populations 1 and 2 merge at 10,000 generations to form a single ancestral population of initial size  $N_A = 17,000$  individuals for  $\phi$  generations. The ancestral population then changes to  $\lambda N_A$ , (drawn uniformly from  $[1.7 \times 10^2, 1.7 \times 10^6]$ ), for  $\tau$  generations, before returning to  $N_A$ . We investigate the impact of that change in ancestral population size ( $\lambda N_A$  for  $\tau$  generations) on TT estimates of population divergence time ( $\hat{t}$ ) and ancestral population size,  $\hat{N}_A$ , for  $\tau = 0, 100, 500, 1,000$  generations and  $\phi = 0, 100, 500, 2,000$  generations (figure S1). Figure S1 shows that increasing ancestral population size for  $\tau$  generations can have the effect of inflating divergence time estimates for the TT method. This behaviour is expected; if we imagine an expansion of the ancestral population to infinite size for  $\tau$  generations, no coalescence events would occur during that time, and divergence time estimates would be upwardly biased by  $\tau$  generations. This bias however seems to be relatively minor compared to that arising from severe bottlenecks. For instance, when the true  $t = 10,000$ , a bottleneck in the ancestral population of 1,500 individuals lasting for 100 generations results in  $\hat{t} \approx 9,000$  generations. However, the same severity of bottleneck lasting for 500 generations will result in a greater underestimate of  $\hat{t} \approx 5,000$  generations. Similarly,  $N_A$  is underestimated when severe bottlenecks occur, though these estimates seem to be more robust than estimates of divergence time (figure S2). When studying more recent splits, (1500 generations), we observe that severe bottlenecks have the potential to result in nonsensical negative split time estimates (figure S3).

Figure 3 shows a comparison between TT method and GPhoCS estimates of population divergence time ( $\hat{t}$ ) and ancestral population size ( $\hat{N}_A$ ) in cases where the duration of the bottleneck ( $\tau$ ) is fixed at 1,000 generations and true split time is 10,000 generations. Results suggest that both methods react similarly to violations of the assumption of a change in ancestral population size; each being particularly susceptible to bias when severe bottlenecks have occurred. GPhoCS performs somewhat better than the TT method, with severe bottlenecks resulting in less of an underestimate of population divergence time.

An interesting effect appears when a bottleneck of sufficient severity occurs, whereby both methods'  $\hat{t}$  estimates begin to rebound towards the true split time of 10,000 generations. Again this behaviour is expected as all lineages will coalesce in a bottleneck of sufficient severity prior to a population divergence event. In this case the bottleneck itself will act as the constant ancestral population size, and as long as it occurs in close proximity to the split, divergence time estimates are not affected much. For the same reason, when a severe bottleneck occurs a long time prior to the split, both methods produce a (slight) overestimate of the true divergence time (figure 3E).

### The effect of migration between branches

In simulations based on the demographic scenario shown in figure 2B, a pulse of admixture occurs  $\delta$  generations ago, with proportion  $0 \leq \gamma \leq 1$  of one daughter population made up of migrants from the other daughter population. Thus we examine the effect of increasing proportion of migration occurring at various times between present and the split time. All popula-

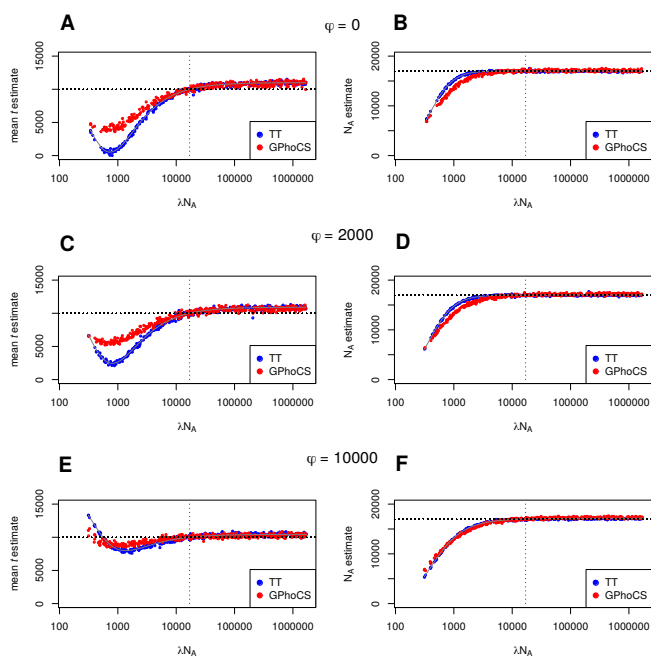

**Figure 3** A comparison of the effect of ancestral population size changes on TT method and GPhoCS parameter estimates. The time between population divergence and change in ancestral population size ( $\phi$ ) is (A, B) 0, (C, D) 2,000, and (E, F) 10,000 generations. In all cases, the duration of change in ancestral population size ( $\tau$ ) is 1,000 generations and true split time is 10,000 generations.

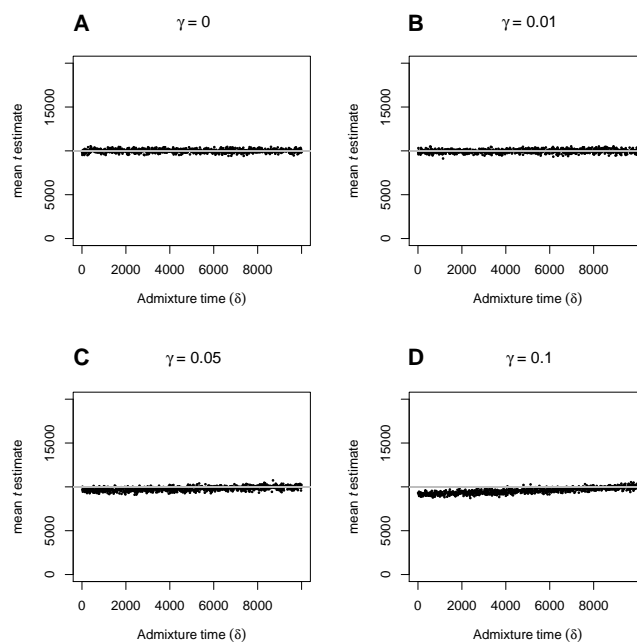

**Figure 4** The effect of varying admixture time ( $\delta$ ) on TT split time estimates ( $\hat{t}$ ), when proportion of admixture ( $\gamma$ ) is (A) 0, (B) 0.01, (C) 0.05 and (D) 0.1, and true split time is 10,000 generations.

1 tions are kept fixed and constant at 17,000 diploid individuals  
 2 ( $N_1 = N_2 = N_A$ ). Figures 4 and 5 show the effect of increasing  
 3 proportion of migrants on TT divergence time estimates when  
 4 true split time is 10,000 generations. Divergence times are reli-  
 5 ably estimated when the proportion of migrants is below 0.1,  
 6 and as expected, even at higher proportions the bias decreases  
 7 the nearer the admixture event is to split time. Note that under  
 8 this set up, the TT method returns  $\hat{t} \approx 3,000$  generations even  
 9 when the proportion of migrants ( $\gamma$ ) is 1 and admixture time ( $\delta$ )  
 10 is 0. We would expect in this case a  $\hat{t} = 0$ , but it seems that this  
 11 scenario (where all populations are equal in size) is equivalent to  
 12 a violation of the assumption of a constant ancestral population.  
 13 As described previously, this has the effect of biasing  $\hat{t}$  upwards,  
 14 and shows that in cases of high proportion of recent admixture,  
 15 differences between the size of the daughter populations and  
 16 the ancestral population also has the potential to result in biased  
 17  $\hat{t}$ . Estimates of ancestral population size on the other hand, are  
 18 only very slightly affected (figures S4 and S5). Very similar re-  
 19 sults are observed when a more recent true split time of 1500  
 20 generations is studied (figures S6 and S7).

21 While simulations have shown the TT method to be relatively  
 22 robust to violations of its assumptions in general, it is evident  
 23 that extensive, recent gene flow between daughter populations  
 24 or strong, prolonged bottlenecks in the ancestral population  
 25 have the potential to introduce bias. If however we obtain exter-  
 26 nal estimates of  $\alpha_1$  and  $\alpha_2$  through the outgroup ascertainment  
 27 procedure outlined above (TTo), we can obtain estimates of di-  
 28 vergence time that are much less dependent on assumptions  
 29 concerning the ancestral population. Figure 6 shows a compar-  
 30 ison of TT and TTo method results in scenarios of increasing  
 31 duration of ancestral population size change. The true values of

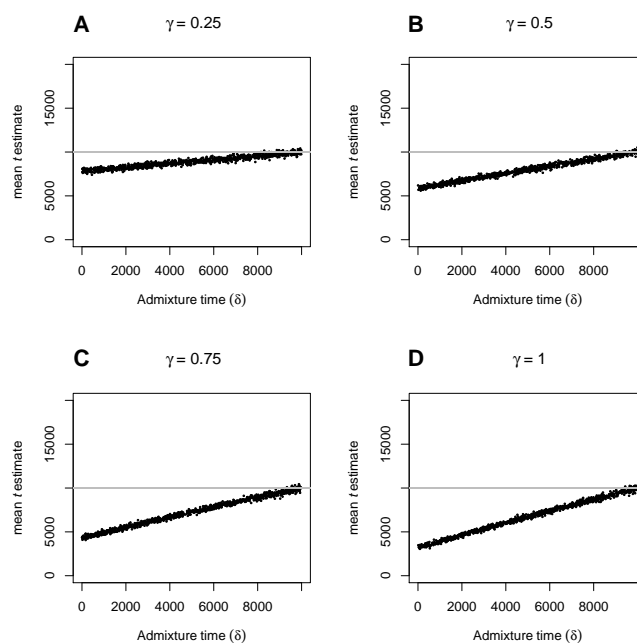

**Figure 5** The effect of varying admixture time ( $\delta$ ) on TT split time estimates ( $\hat{t}$ ), when proportion of admixture ( $\gamma$ ) is (A) 0.25, (B) 0.5, (C) 0.75 and (D) 1, and true split time is 10,000 generations.

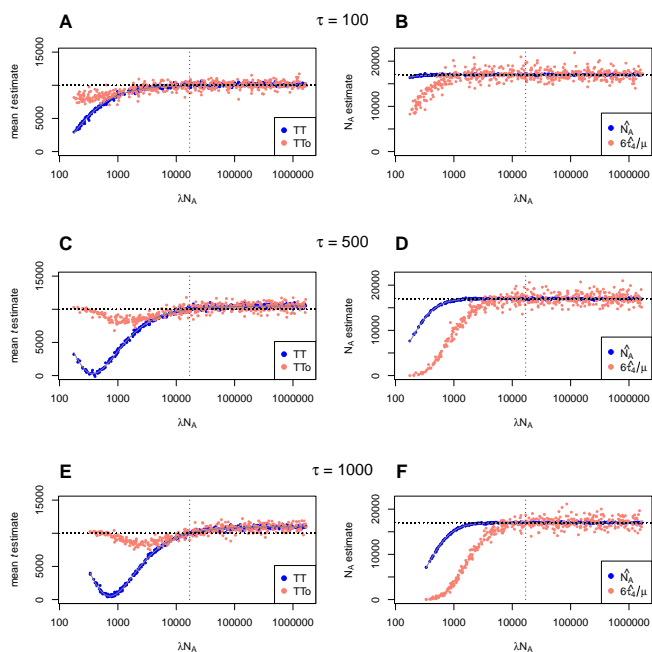

**Figure 6** A comparison of TT method estimates of divergence time and ancestral population size with (TTo), and without (TT) using external estimates of drift. The duration of alternative ancestral population size ( $\tau$ ) is (A, B) 100, (C, D) 500, and (E, F) 1,000 generations. In all cases, the change in ancestral population size occurs immediately prior to the split ( $\phi=0$ ) and true split time is 10,000 generations.

1  $\alpha_1$  and  $\alpha_2$  have been used in equations in 7 to obtain estimates  
 2 of  $B_1$ ,  $B_2$ ,  $\tau_2$  and  $\tau_3$ , that in turn have been used to approximate  
 3  $\tau_4$  and divergence times following equation 8. These results  
 4 show that by using external estimates of drift, there is the po-  
 5 tential to considerably reduce bias in divergence time estimates  
 6 when severe bottlenecks have occurred in the ancestral popula-  
 7 tion. Furthermore, figure 6 also compares estimates of  $N_A$ , from  
 8 that of the TT method to one based on the TTo estimate of  $\tau_4$   
 9 ( $6\hat{\tau}_4/\mu$ ), which is found to be much more sensitive to ancestral  
 10 bottlenecks.

## 11 Application to data

12 The TT method requires good quality sequence data, typically  
 13 high-coverage genome sequence data since diploid genotype  
 14 calls are utilized, including invariable sites and singletons (in  
 15 the sample of four chromosomes). The formulas are sufficiently  
 16 simple to allow for asymptotic confidence intervals based on  
 17 MLE theory, and one can imagine thinning the genome data to  
 18 make sites independent of each other (to overcome potential  
 19 dependence via linkage). However, we chose a more conserva-  
 20 tive approach of estimating confidence; the weighted block  
 21 jackknife procedure (Busing *et al.* 1999), which should be more  
 22 robust to large-scale “outlier” regions driving the signal. We con-  
 23 ducted pairwise comparisons among the 11 HGDP individuals  
 24 and the Denisovan genome and the Altai Neandertal genome  
 25 from (Meyer *et al.* 2012) and (Prüfer *et al.* 2014) and estimate pop-  
 26 ulation divergence times (see appendix for a description of data  
 27 cleaning and calling of ancestral states). The 11 HGDP individ-  
 28 uals include 5 individuals from Africa: one Khoe-San (‘San’), one  
 29 rainforest hunter-gatherer (‘Mbuti’), two West-African (‘Man-

denka’ and ‘Yoruba’) and one East-African (‘Dinka’). The other  
 30 individuals were two Europeans (‘French’ and ‘Sardinian’), two  
 31 East-Asians (‘Han’ and ‘Dai’), one individual from Oceania  
 32 (‘Papuan’) and one individual representing a South-American  
 33 indigenous population (‘Karitiana’). In addition, we used the  
 34 high coverage ancient southern African hunter-gatherer genome  
 35 (‘Balito Bay A’, (Schlebusch *et al.* 2017) as an outgroup for some  
 36 divergence estimates (see below).  
 37

## 38 Split model parameter estimates

39 We refer to split time estimates *in years* in the TT-method as  $\hat{t}_i$   
 40 and under the TTo-method as  $\hat{t}_i^*$ . These are obtained by setting  
 41  $G = 30$  and  $\mu = 1.25 \times 10^{-8}$  in equation (4) and applying this  
 42 to the estimates of  $T_1$  and  $T_2$  in equations (3) and equation (8)  
 43 respectively.

44 Comparisons are grouped according to the population split  
 45 they represent. For instance, the comparison between French  
 46 and San is referred to as the ‘Khoe-San split’.

## 47 Divergence estimates according to the TT-method

48 Assuming a constant ancestral population size,  $N_A$ , it is possible  
 49 to estimate  $N_A$ ,  $\alpha_1$ ,  $\alpha_2$ ,  $\nu_1$ ,  $\nu_2$  as well as  $t_1$ ,  $t_2$  without relying on  
 50 ascertainment procedures. Estimates of  $\alpha$ ,  $N_A$  and  $\nu$  are shown  
 51 in supplementary figures S9, S8 and S10 respectively. From  
 52 figure S10 it is apparent that  $\nu$  is often poorly estimated and the  
 53 uncertainty of the estimate appears to be closely linked to the  
 54 amount of branch-specific genetic drift (figure S11). A closer  
 55 look at any of the formulas for  $p_{i,j}$  reveals that the impact of  $\nu$   
 56 on the probabilities disappears as  $\alpha$  approaches 1 (no drift).

57 Estimates of the ancestral population size remain remark-  
 58 ably constant at around  $N_A = 17,000$ , regardless of choice of  
 59 individuals (figure S8).

60 Values of  $\hat{t}$  are shown in figure 7. To summarize, estimates of  
 61 the different split times are (in descending order)

- 62 • the split between Neanderthal and Denisovans 962 – 979  
63 kya;
- 64 • the split between archaic humans and modern humans  
65 510 – 707 kya;
- 66 • the deepest split among modern human population (be-  
67 tween Khoe-San and other human populations) 233 – 266  
68 kya (see (Schlebusch *et al.* 2017) for the consequence of using  
69 the ancient southern African Balito Bay A genome);
- 70 • the split between Mbuti and other modern human population (exclud-  
71 ing Khoe-San populations) 186 – 220 kya
- 72 • the split between West-Africans and East-Africans 96 – 117  
73 kya;
- 74 • the split between East-Africans and non-African 66 – 82  
75 kya;
- 76 • splits between non-African < 0 ya.

77 Here, the range for the split between archaic and modern  
 78 humans takes into account the fact that the archaic genomes are  
 79 older than 40 ky. There are two obvious odd sets of estimates  
 80 among these: the negative times for non-Africans, and the deep  
 81 time between Denisovans and Neandertals contrasted to the  
 82 younger time between Denisovans/Neandertals and modern  
 83 humans (note that we assume a constant ancestral population  
 84 size here). We discuss each of these split time estimates below,  
 85 but first we revisit the utility of ascertaining variants in an  
 86 outgroup.  
 87



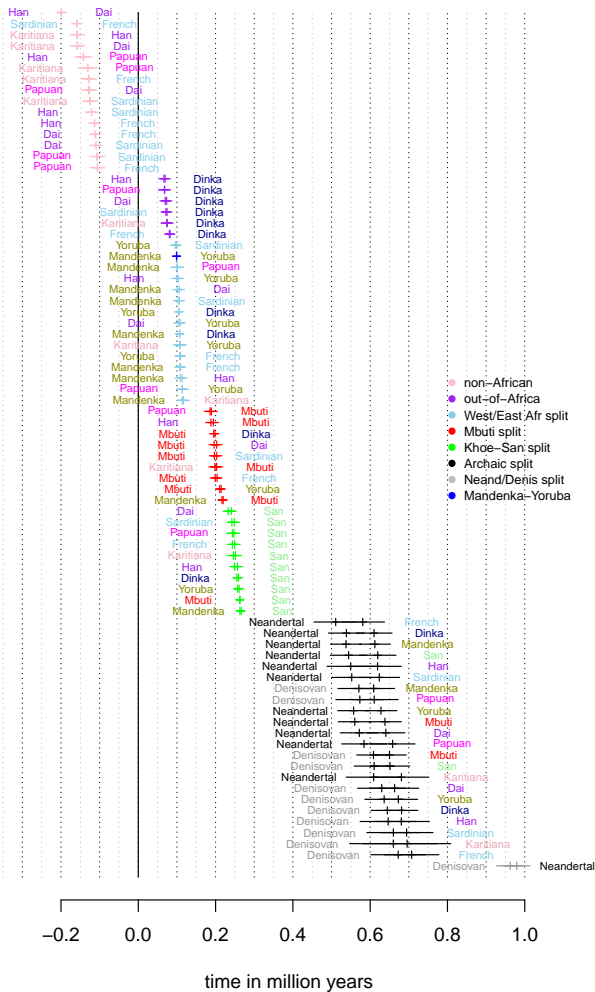

**Figure 7** Split time estimates assuming a constant ancestral population and a mutation rate of  $1.25 \times 10^{-8}$  and a generation time of 30 years. Corresponding to the branch specific divergence time, there are two estimates each comparison.

### Divergence estimates according to the TTo-method

By comparing two individuals using only those sites where the derived variant was present in an outgroup, it is possible to: i) test whether the outgroup represents a true outgroup, and ii) obtain estimates of  $\alpha_1$  and  $\alpha_2$  that do not rely on assumptions concerning the ancestral population. We utilized the Mbuti, Balito Bay A or Neandertal/Denisovan as outgroups. The estimates of  $\alpha$  conditional on the derived variant being present in an outgroup are shown in figure S15. These three options were variably suitable as outgroups depending on the comparison being made. For instance, when comparing an individual from outside Africa to an African individual, Neandertal/Denisovan would not be true outgroups given the archaic admixture shared among non-African individuals (Green *et al.* 2010). This was also visible in the tests based on equations 5 and 6 above (as well as the D-test, see figure S12 in supplementary material). A likely consequence of the documented additional Denisovan ancestry in Papuan (Meyer *et al.* 2012) is that no comparison involving Papuan passed the outgroup tests. Perhaps more surprising, any comparison involving Mbuti failed the tests when Balito Bay A was used as the outgroup. Moreover, both Mbuti and Balito Bay A were expected to be true outgroups for the comparison of Neandertal versus Denisovan, but the test, however, pointed to them not being true outgroups.

Comparisons between estimates of  $\theta$  (assuming a constant ancestral population size) to estimates of  $\tau_2$  and  $3\tau_3$  using different outgroups for ascertainment are shown in figures S16, S18 and S17. Since there is presently no suitable outgroup for comparisons between a modern human and one of the two archaic humans – this would require a genome from an archaic human that split off before the Neandertal/Denisovan branch – it was not possible to estimate  $\tau_2$  and  $3\tau_3$  for such comparisons.

When reliable outgroup ascertained estimates of  $\alpha_1$  and  $\alpha_2$  can be obtained, we estimate  $\tau_2$ ,  $\tau_3$ ,  $B_1$  and  $B_2$  using equations 7 that are used in equation (8) to obtain an estimate of  $T_i^*$ . This in turn gives  $\hat{t}_i^*$  that are shown in figures S16, S17, S18, S19, S20, S21. For the majority of comparisons, such an approach does not yield different estimates compared to assuming a constant ancestral population size. The major exceptions to this are those comparisons involving non-Africans, that shows positive and realistic divergence time estimates using the ascertainment scheme (Figure 8).

### Divergence times outside Africa

The divergence time estimates for non-African populations under a constant model ( $\hat{t}_i$ ) are nonsensical, (negative values). This is likely a consequence of the severe out-of-Africa bottleneck that leads to  $\tau_4 = \mu E[T_{44}]$  being much smaller than  $\tau_2/6$ , which then violates the assumption of a constant  $N_A$  ( $E[T_{nk}] = 2N_A/k(k-1)$  in a constant population with  $N_A$  chromosomes). Estimates based on the three outgroup ascertainment schemes ( $\hat{t}_i^*$ ) give more reasonable values as shown in figure 8.

Here, the split times estimates are:

- 50 to 75 kya between Europeans and Asians/Americans
- $\sim 40$  kya between Sardinians and French
- 25 to 30 kya between Dai and Karitiana
- 25 to 30 kya between Dai and Han
- $< 25$  kya between Han and Karitiana

These estimates are generally consistent with the prevailing

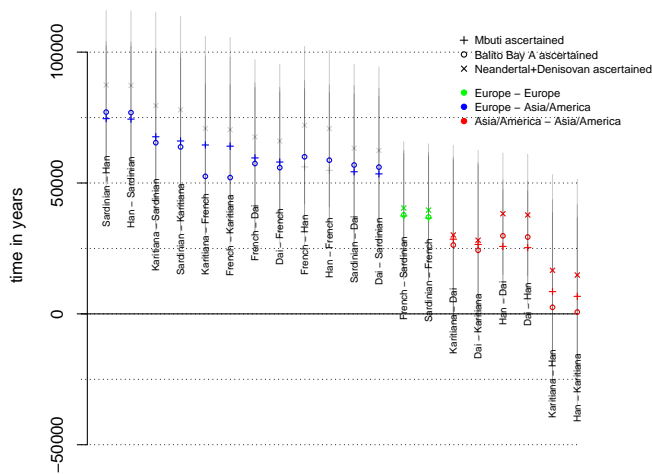

**Figure 8** Different estimates of split times using outgroup ascertainment assuming a mutation rate of  $1.25 \times 10^{-8}$  and a generation time of 30 years. Comparisons with Papuans not included as no such comparison passed the outgroup-tests. Three estimates are shown: estimates where outgroup ascertainment is performed in Mbuti (+), in Balto Bay A (o) and in Neandertal/Denisovan (x). Transparent grey represents standard deviation and for comparisons that failed the outgroup tests.

view of the demographic history outside Africa. For instance, the deep split between Sardinians and French may reflect previous findings that while Sardinians trace their ancestry mostly to the early Neolithic farmers, the French are more admixed with European hunter-gatherers and components of the Yamnaya expansion (Skoglund *et al.* 2014; Günther *et al.* 2015; Allentoft *et al.* 2015; Haak *et al.* 2015). To interpret the split times between Han, Dai and Karitiana, it should be noted that Karitiana is best modelled as a combination of three source populations (an ancient Siberian Eurasian source, a north East Asian source and an Australasian source), where the north East Asian contribution is substantially greater than the other two sources combined (Skoglund *et al.* 2015; Raghavan *et al.* 2015). The fact that the Karitiana show a more recent divergence with Han than with Dai likely reflects north East Asians contributing substantially to Native Americans, and that the Dai has a south East Asian component (closer to an Australasians, Skoglund *et al.* 2015; Raghavan *et al.* 2015). This admixture pattern results in shallower divergence between Karitiana and Han, and deeper divergence between Karitiana and Dai and between Han and Dai (see e.g. figure 2 in Raghavan *et al.* 2015).

### Western vs Eastern Africa and timing of the out-of-Africa event

Assuming a constant ancestral population size, we estimate the split between non-Africans and East-Africans (Dinka) to be between 66 and 82 kya. The split between Mandenka and Yoruba is estimated to 100 kya while the split between Western Africans and Eastern Africans (Dinka and non-Africans) is estimated to between 96 and 117 kya.

The estimates based on the three outgroup ascertainment schemes ( $\hat{t}_i^*$ ) are generally older. Although the demographic history of Western and Eastern Africa appears to be particularly complex (Pickrell *et al.* 2014; Gurdasani *et al.* 2015; Triska *et al.* 2015; Busby *et al.* 2016; Hollfelder *et al.* 2017), and the standard deviation estimates suggest one should not over-interpret the  $\hat{t}_i^*$  values, there are a few interesting tendencies among these estimates (figure 9). First, estimated split times are consistently lower among Yoruba, Mandenka and Dinka than between any of these populations and a non-African population; likely an effect of gene flow among the three African populations (Gurdasani *et al.* 2015; Busby *et al.* 2016; Schlebusch and Jakobsson 2018). Second, estimates between Yoruba and Dinka (or non-Africans) are deeper than split time estimates between Mandenka and Dinka (or non-Africans). This is consistent with some observations suggesting that Mandenka have a greater east African/European ancestry component compared to Yoruba (Gurdasani *et al.* 2015; Patin *et al.* 2017; Schlebusch and Jakobsson 2018). Although Mandenka is more distant geographically from Dinka than Yoruba, there is evidence that historical trading routes along the Sahel belt may have resulted in more gene-flow between East Africans and Mandenka (than with Yoruba) (Triska *et al.* 2015; Černý *et al.* 2018). Third, there is a tendency for split estimates between East Asians (Dai or Han) and West Africans (Yoruba, Mandenka or Dinka) to be deeper than split estimates between Europeans (French or Sardinian) and West Africans. This observation, combined with gene-flow between east and west Africa, is consistent with previous suggestions of migration into East Africa from a European or Middle Eastern source (Lorente *et al.* 2015).

### Deepest splits among modern human populations

The split between Khoe-San and other modern human populations are estimated to around 250 kya using the TT-method

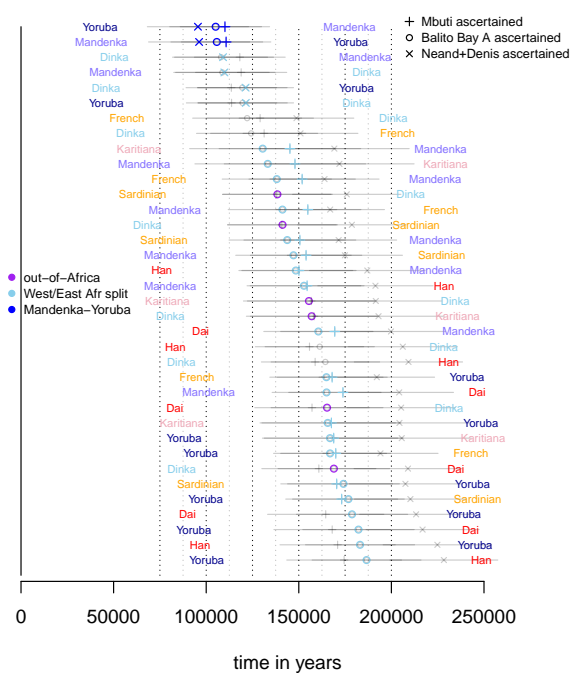

**Figure 9** Different estimates of split times using outgroup ascertainment assuming a mutation rate of  $1.25 \times 10^{-8}$  and a generation time of 30 years. Three estimates are shown: estimates where outgroup ascertainment is performed in Mbuti (+), in Balito Bay A (o) and in Neandertal/Denisovan (x). Transparent grey represents standard deviation and for comparisons that failed the outgroup tests.

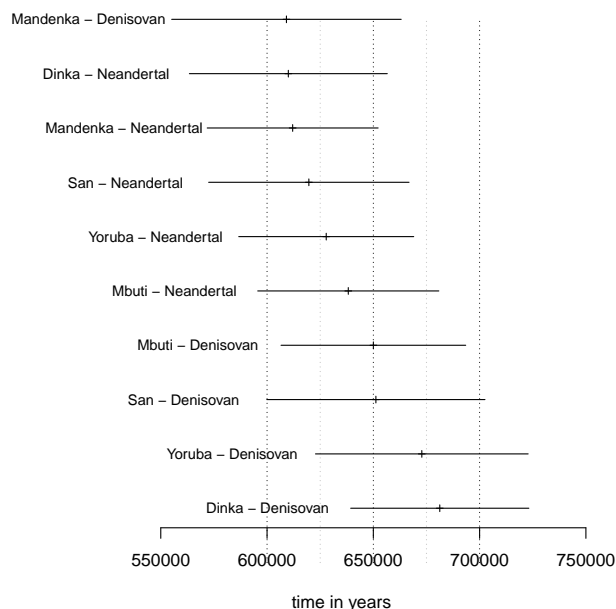

**Figure 10** Split time estimates between the five African individuals and the two archaic humans assuming a constant ancestral population. Only estimates based on the non-ancient branch are shown. A mutation rate of  $1.25 \times 10^{-8}$  and a generation time of 30 years is assumed.

human populations (Schlebusch *et al.* 2012).

### Archaic split times

The split between modern humans and both Neandertal and Denisovan is estimated to be between 510 and 707 kya, which is in line with previous such estimates (e.g., Prüfer *et al.* 2014). In fact, restricting the analysis to split times on the non-ancient branch (to alleviate issues with fossil dating and potential excess ancient DNA damage) and only to comparisons between Africans and the two archaic humans, gives a range of estimates from 609 to 681 kya (figure 10). Unfortunately, there is (presently) no suitable outgroup for comparisons between modern humans and archaic humans in order to utilize the outgroup ascertainment approach.

The estimated split between Neandertal and Denisovan is around 970 kya; more than 250 ky older than the split between modern humans and archaic humans. This is likely an artifact of violating the model assumptions; the existence of a more complex demography is indicated by our finding that neither Mbuti nor Balito Bay A were found to be true outgroups to the Neandertal-Denisovan comparison according to our outgroup test and the D-test (figures S14 and S13). Some studies hypothesize that the demographic relationship between Neandertals and Denisovans was governed by meta-population dynamics (Rogers *et al.* 2017). Others suggest complicating demographic factors such as admixture between Denisovans and *Homo erectus* (Prüfer *et al.* 2014) or admixture from the modern human branch into the Altai Neandertal (Kuhlwilm *et al.* 2016).

(Schlebusch *et al.* 2017). It was further demonstrated that all modern-day Khoe-San groups and individuals, including the HGDP San individuals investigated here, were affected by Eurasian/east African admixture, which in turn impacts estimates of the deepest divergence of modern humans (different methods are differently sensitive to admixture), (Schlebusch *et al.* 2017). This observation became evident in comparisons with an ancient southern African individual (the Balito Bay A boy who lived some 2,000 years ago), closely related to modern-day Khoe-San individuals, but without the Eurasian/east African admixture that post-dated the life-time of the Balito Bay A boy. Population divergence time estimates based on the ancient Balito Bay A boy predates the estimates based on modern-day Khoe-San individuals, and give an estimate that is unaffected by the migration and admixture in the last 2000 years (Schlebusch *et al.* 2017).

Above we showed the effect of assuming a constant ancestral population size, and how violations of this assumption by a bottleneck in the ancestral population can bias divergence time estimates. However, we find no evidence for such a bottleneck in the common ancestral population to all modern humans, and hence

In general, we find very little difference between the TT and the TTo estimates (figure S19). In fact, there is a tendency for  $\hat{t}_i^*$  to be lower than  $\hat{t}_i$  for the Mbuti-split, providing additional support that the Khoe-San split is the deepest split among modern

## 1 Conclusion

2 We present a simple approach to estimate parameters under a  
3 comparatively general split model. In particular, no assumptions  
4 are needed concerning the population size processes/changes in  
5 the daughter populations (i.e., more recent than the split). The  
6 underlying model does not include gene-flow between daughter  
7 population, however, we can show that moderate violation of  
8 this assumption has little impact on the population divergence-  
9 time estimates. Assuming a constant ancestral population size,  
10 this approach provides an unbiased estimate of divergence time.  
11 However, when the ancestral population is not constant, and  
12 particularly in the case of severe bottlenecks, divergence time  
13 estimates can be biased. Indeed, simulations comparing the  
14 TT-method to GPhoCS – an alternative, fundamentally different  
15 approach to demographic inference, has shown that the two  
16 methods are sensitive to violations of the same assumptions.  
17 The reason for this can be intuitively understood in terms of the  
18 tMRCA in the ancestral population; most of this time is spent  
19 with two lineages and the duration of this is utilized by both  
20 methods to estimate the size of the ancestral population. Since,  
21 by assumption, the ancestral size is constant, if the time to the  
22 first coalescent event in the ancestral population is shorter than  
23 expected, (for instance, due to a bottleneck shortly before the di-  
24 vergence), then both methods underestimate the true population  
25 divergence time. When such severe bottlenecks have occurred,  
26 we have shown that it is possible to reduce much of this bias  
27 through the outgroup ascertainment procedure implemented in  
28 the TTo-method.

29 Applying the TT-method to a sample of 11 genomes from  
30 the HGDP panel together with the Neandertal and Denisovan  
31 genomes, we provide further information on the details of the  
32 various splits within the sample and corroborate many previ-  
33 ously estimated population divergence times.

34 Finally, accumulating evidence suggests that human evolu-  
35 tion is highly reticulated, and perhaps not well approximated by  
36 the sort of bifurcating tree-models studied here (Schlebusch and  
37 Jakobsson 2018; Henn *et al.* 2018; Scerri *et al.* 2018; Stringer 2016).  
38 Nonetheless, the framework presented here is still a useful tool:  
39 different population genetic methods vary in their assumptions  
40 and sensitivities to model violations, thus it is important when  
41 investigating the complex demographies underlying the evolu-  
42 tion of humans to have access to a variety of different methods.  
43 The TT-method is relatively robust to model violations and pro-  
44 vides a simple and transparent analytic framework that can be  
45 compared to, and potentially even integrated with, other, more  
46 computationally demanding methods (Beichman *et al.* 2017; Ter-  
47 horst *et al.* 2017; Wang *et al.* 2020).

## 48 Data availability

49 Genome sequence data from the following publications was ex-  
50 tracted and reprocessed in order to avoid mapping and filtering  
51 biases: Prüfer *et al.* (2014); Schlebusch *et al.* (2017). Scripts used  
52 in simulations and plotting of results, together with open source  
53 code for running the TT method is freely available in Python at  
54 [github.com/jammc313/TT-method](https://github.com/jammc313/TT-method).

## 55 Literature Cited

56 Allentoft, M. E., M. Sikora, K.-G. Sjögren, S. Rasmussen, M. Ras-  
57 mussen, *et al.*, 2015 Population genomics of bronze age eurasia.  
58 *Nature* **522**: 167.

Beaumont, M., A. Zhang, and W. Balding, 2002 Approximate  
Bayesian computation in population genetics. *Genetics* **162**:  
2025–2035.  
Beichman, A. C., T. N. Phung, and K. E. Lohmueller, 2017 Com-  
parison of single genome and allele frequency data reveals  
discordant demographic histories. *G3: Genes, Genomes, Ge-  
netics* **7**: 3605–3620.  
Busby, G. B., G. Band, Q. Si Le, M. Jallow, E. Bougama, *et al.*,  
2016 Admixture into and within sub-saharan africa. *eLife* **5**:  
e15266.  
Busing, F. M. T. A., E. Meijer, and R. V. D. Leeden, 1999 Delete-m  
jackknife for unequal m. *Statistics and Computing* **9**: 3–8.  
Chen, H., 2012 The joint allele frequency spectrum of multi-  
ple populations: A coalescent theory approach. *Theoretical  
Population Biology* **81**: 179 – 195.  
Cornuet, J., M. Pudlo, P. Veyssier, J. Dehne-Garcia, A. Gau-  
tier, *et al.*, 2014 DIYABC v2.0: a software to make approx-  
imate Bayesian computation inferences about population  
history using single nucleotide polymorphism, DNA se-  
quence and microsatellite data. *Bioinformatics* **30**: 1187–1189,  
doi:10.1093/bioinformatics/btt763.  
Doob, J. L., 1934 Probability and statistics. *Transactions of the  
American Mathematical Society* **36**: 759–775.  
Excoffier, L., I. Dupanloup, E. Huerta-Sánchez, V. C. Sousa, and  
M. Foll, 2013 Robust demographic inference from genomic  
and SNP data. *PLoS Genet.* **9**: e1003905.  
Gattepaille, L., T. Günther, and M. Jakobsson, 2016 Inferring  
past effective population size from distributions of coalescent  
times. *Genetics* **204**: 1191–1206.  
Green, R. E., J. Krause, A. W. Briggs, T. Maricic, U. Stenzel, *et al.*,  
2010 A Draft Sequence of the Neandertal Genome. *Science*  
**328**: 710–722.  
Griffiths, R. and S. Tavaré, 1998 The age of a mutation in a gen-  
eral coalescent tree. *Communications in Statistics. Stochastic  
Models* **14**: 273–295.  
Gronau, I., M. Hubisz, J. Gulko, B. Danko, and C. Siepel, 2011  
Bayesian inference of ancient human demography from in-  
dividual genome sequences. *Nature Genetics* **43**: 1031–1035,  
doi:10.1038/ng.937.  
Günther, T., C. Valdiosera, H. Malmström, I. Ureña,  
R. Rodriguez-Varela, *et al.*, 2015 Ancient genomes link early  
farmers from atapuerca in spain to modern-day basques. *Pro-  
ceedings of the National Academy of Sciences* **112**: 11917–  
11922.  
Gurdasani, D., T. Carstensen, F. Tekola-Ayele, L. Pagani, I. Tach-  
mazidou, *et al.*, 2015 The african genome variation project  
shapes medical genetics in africa. *Nature* **517**: 327–332.  
Gutenkunst, R. N., R. D. Hernandez, S. H. Williamson, and C. D.  
Bustamante, 2009 Inferring the joint demographic history of  
multiple populations from multidimensional SNP frequency  
data. *PLoS Genet* **5**: e1000695.  
Haak, W., I. Lazaridis, N. Patterson, N. Rohland, S. Mallick,  
*et al.*, 2015 Massive migration from the steppe was a source  
for indo-european languages in europe. *Nature* **522**: 207.  
Henn, B. M., T. E. Steele, and T. D. Weaver, 2018 Clarifying  
distinct models of modern human origins in africa. *Current  
Opinion in Genetics & Development* **53**: 148 – 156, *Genetics  
of Human Origins*.  
Hollfelder, N., C. M. Schlebusch, T. Günther, H. Babiker, H. Y.  
Hassan, *et al.*, 2017 Northeast african genomic variation  
shaped by the continuity of indigenous groups and eurasian  
migrations. *PLOS Genetics* **13**: 1–17.

- 1 Hudson, R., 2002 Generating samples under a Wright–Fisher  
2 neutral model of genetic variation. *Bioinformatics* **18**: 337–338,  
3 doi:10.1093/bioinformatics/18.2.337.
- 4 Kelleher, J., Y. Wong, A. W. Wohns, C. Fadil, P. K. Al-  
5 bers, *et al.*, 2019 Inferring whole-genome histories in  
6 large population datasets. *Nature Genetics* **51**: 1330–1338,  
7 doi.org/10.1038/s41588-019-0483-y.
- 8 Kuhlwilm, M., I. Gronau, M. J. Hubisz, C. de Filippo, J. Prado-  
9 Martinez, *et al.*, 2016 Ancient gene flow from early modern  
10 humans into eastern neanderthals. *Nature* **530**: 429–433.
- 11 Li, H. and R. Durbin, 2011 Inference of human population history  
12 from individual whole-genome sequences. *Nature* **475**: 493–  
13 496, doi:10.1038/nature10231.
- 14 Llorente, M. G., E. R. Jones, A. Eriksson, V. Siska, K. W.  
15 Arthur, *et al.*, 2015 Ancient ethiopian genome reveals extensive  
16 eurasian admixture in eastern africa. *Science* **350**: 820–822.
- 17 Lohse, K., M. Chmelik, S. H. Martin, and N. H. Barton, 2016 Effi-  
18 cient Strategies for Calculating Blockwise Likelihoods Under  
19 the Coalescent. *Genetics* **202**: 775+.
- 20 Lohse, K., R. J. Harrison, and N. H. Barton, 2011 A General  
21 Method for Calculating Likelihoods Under the Coalescent  
22 Process. *Genetics* **189**: 977–U398.
- 23 Mazet, O., W. Rodriguez, S. Grusea, S. Boitard, and L. Chikhi,  
24 2016 On the importance of being structured: instantaneous  
25 coalescence rates and human evolution—lessons for ances-  
26 tral population size inference? *Heredity* **116**: 362–371,  
27 doi:10.1038/hdy.2015.104.
- 28 Meyer, M., M. Kircher, M.-T. Gansauge, H. Li, F. Racimo, *et al.*,  
29 2012 A high-coverage genome sequence from an archaic  
30 denisovan individual. *Science* **338**: 222–226.
- 31 Moorjani, P., Z. Gao, and M. Przeworski, 2016 Human Germline  
32 Mutation and the Erratic Evolutionary Clock. *PLoS Biol* **14**:  
33 e2000744, doi:10.1371/journal.pbio.2000744.
- 34 Orozco, P., 2016 The devil is in the details: the effect of pop-  
35 ulation structure on demographic inference. *Heredity* **116**:  
36 349–350, doi:10.1038/hdy.2016.9.
- 37 Patin, E., M. Lopez, R. Grollemund, P. Verdu, C. Harmant, *et al.*,  
38 2017 Dispersals and genetic adaptation of bantu-speaking  
39 populations in africa and north america. *Science* **356**: 543–546.
- 40 Pickrell, J. K., N. Patterson, C. Barbieri, F. Berthold, L. Gerlach,  
41 *et al.*, 2012 The genetic prehistory of southern Africa. *Nature*  
42 *Communications* **3**: 1143.
- 43 Pickrell, J. K., N. Patterson, P.-R. Loh, M. Lipson, B. Berger, *et al.*,  
44 2014 Ancient west eurasian ancestry in southern and eastern  
45 africa. *Proceedings of the National Academy of Sciences* **111**:  
46 2632–2637.
- 47 Prüfer, K., F. Racimo, N. Patterson, F. Jay, S. Sankararaman, *et al.*,  
48 2014 The complete genome sequence of a neanderthal from  
49 the altai mountains. *Nature* **505**: 43–49.
- 50 Pudlo, P., J. Marin, A. Estoup, J. Cornuet, M. Gautier, *et al.*, 2016  
51 Reliable abc model choice via random forests. *Bioinformatics*  
52 **32**: 859–866.
- 53 Raghavan, M., M. Steinrücken, K. Harris, S. Schiffels, S. Ras-  
54 mussen, *et al.*, 2015 Genomic evidence for the pleistocene and  
55 recent population history of native americans. *Science* **349**.
- 56 Rogers, A. and R. Bohlender, 2014 Bias in estimators of archaic  
57 admixture. *Theoretical Population Biology* **100**: 63–78,  
58 doi.org/10.1016/j.tpb.2014.12.006.
- 59 Rogers, A. R., R. J. Bohlender, and C. D. Huff, 2017 Early history  
60 of neanderthals and denisovans. *Proceedings of the National*  
61 *Academy of Sciences* **114**: 9859–9863.
- 62 Scally, A. and R. Durbin, 2012 Revising the human mutation  
rate: implications for understanding human evolution. *Nature*  
*Reviews Genetics* **13**: 745–753.
- Scerri, E. M., M. G. Thomas, A. Manica, P. Gunz, J. T. Stock, *et al.*,  
2018 Did our species evolve in subdivided populations across  
africa, and why does it matter? *Trends in Ecology & Evolution*  
**33**: 582 – 594.
- Schiffels, S. and R. Durbin, 2014 Inferring human population  
size and separation history from multiple genome sequences.  
*Nature Genetics* **46**: 919–925, doi:10.1038/ng.3015.
- Schlebusch, C. M. and M. Jakobsson, 2018 Tales of human mi-  
gration, admixture, and selection in africa. *Annual Review of*  
*Genomics and Human Genetics* **19**: null, PMID: 29727585.
- Schlebusch, C. M., H. Malmström, T. Günther, P. Sjödin,  
A. Coutinho, *et al.*, 2017 Southern african ancient genomes es-  
timate modern human divergence to 350,000 to 260,000 years  
ago. *Science* **358**: 652–655.
- Schlebusch, C. M., P. Skoglund, P. Sjödin, L. M. Gattepaille,  
D. Hernandez, *et al.*, 2012 Genomic variation in seven khoe-  
san groups reveals adaptation and complex african history.  
*Science* **338**: 374–379.
- Schraiber, J. G. and J. M. Akey, 2015 Methods and models for  
unravelling human evolutionary history. *Nature Reviews Ge-  
netics* **16**: 727–740.
- Skoglund, P., A. Götherström, and M. Jakobsson, 2011 Estima-  
tion of population divergence times from non-overlapping  
genomic sequences: Examples from dogs and wolves. *Molec-  
ular Biology and Evolution* **28**: 1505–1517.
- Skoglund, P., S. Mallick, M. C. Bortolini, N. Chennagiri, T. Hüne-  
meier, *et al.*, 2015 Genetic evidence for two founding popula-  
tions of the americas. *Nature* **525**.
- Skoglund, P., P. Sjödin, T. Skoglund, M. Lascoux, and M. Jakob-  
sson, 2014 Investigating population history using tempo-  
ral genetic differentiation. *Mol Biol Evol* **31**: 2516–2527,  
doi:10.1093/molbev/msu192.
- Slatkin, M., 1996 Gene genealogies within mutant allelic classes.  
*Genetics* **143**: 579–587.
- Speidel, L., M. Forest, S. Shi, and S. Myers, 2019 A method for  
genome-wide genealogy estimation for thousands of samples.  
*Nature Genetics* **51**: 1321–1329.
- Stringer, C., 2016 The origin and evolution of *Homo sapiens*. *Philo-  
sophical Transactions of the Royal Society B: Biological Sci-  
ences* **371**: 20150237.
- Tavaré, S., D. J. Balding, R. C. Griffiths, and P. Donnelly, 1997 In-  
fering coalescence times from DNA sequence data. *Genetics*  
**145**: 505–518.
- Terhorst, J., J. A. Kamm, and Y. S. Song, 2017 Robust and scalable  
inference of population history from hundreds of unphased  
whole-genomes. *Nature genetics* **49**: 303–309.
- Theunert, C. and M. Slatkin, 2018 Estimation of population di-  
vergence times from snp data and a test for treeness. *bioRxiv*
- Triska, P., P. Soares, E. Patin, V. Fernandes, V. Cerny, *et al.*, 2015  
Extensive Admixture and Selective Pressure Across the Sahel  
Belt. *Genome Biology and Evolution* **7**: 3484–3495.
- Černý, V., I. Kulichová, E. S. Poloni, J. M. Nunes, L. Pereira, *et al.*,  
2018 Genetic history of the african sahelian populations. *HLA*  
**91**: 153–166.
- Wakeley, J., 2009 *Coalescent Theory: An Introduction*. Roberts &  
Company Publishers, Greenwood Village, Colorado, first  
edition.
- Wakeley, J. and J. Hey, 1997 Estimating ancestral population  
parameters. *Genetics* **145**: 847–855.

- 1 Wald, A., 1949 Note on the consistency of the maximum like-  
2 lihood estimate. *The Annals of Mathematical Statistics* **20**:  
3 595–601.
- 4 Wang, K., I. Mathieson, J. O’Connell, and S. Schiffels, 2020 Track-  
5 ing human population structure through time from whole  
6 genome sequences. *PLOS Genetics* **16**: 1–24.
- 7 Wilkinson-Herbots, H. M., 2008 The distribution of the coales-  
8 cence time and the number of pairwise nucleotide differences  
9 in the “isolation with migration” model. *Theoretical Popula-  
10 tion Biology* **73**: 277–288.

## Appendix

### Ascertained data

Conditional on the derived variant being present in a true outgroup (in a population that has branched off before the investigated split), there are no mutations within the branches so that  $\mu t_1$ ,  $\mu t_2$ ,  $\mu v_1$  and  $\mu v_2$  can all be set to 0 in the equations 1 above. Thus we are left with

$$\begin{aligned} p_{1,0}^* &= \frac{1}{2}\alpha_1 b_1^* + \frac{1}{3}\alpha_1(1-\alpha_2)b_2^* \\ p_{0,1}^* &= \frac{1}{2}\alpha_2 b_1^* + \frac{1}{3}(1-\alpha_1)\alpha_2 b_2^* \\ p_{2,0}^* &= \frac{1}{4}(1-\alpha_1)b_1^* + \frac{1}{6}(2-\alpha_1-\alpha_2+\alpha_1\alpha_2)b_2^* + \frac{1}{4}(1-\alpha_2)b_3^* \\ p_{0,2}^* &= \frac{1}{4}(1-\alpha_2)b_1^* + \frac{1}{6}(2-\alpha_1-\alpha_2+\alpha_1\alpha_2)b_2^* + \frac{1}{4}(1-\alpha_1)b_3^* \\ p_{1,1}^* &= \frac{2}{3}\alpha_1\alpha_2 b_2^* \\ p_{2,1}^* &= \frac{1}{3}(1-\alpha_1)\alpha_2 b_2^* + \frac{1}{2}\alpha_2 b_3^* \\ p_{1,2}^* &= \frac{1}{3}\alpha_1(1-\alpha_2)b_2^* + \frac{1}{2}\alpha_1 b_3^*. \end{aligned}$$

Under these equations,

$$\begin{aligned} \frac{2p_{1,0}^* + p_{1,1}^*}{2p_{0,1}^* + p_{1,1}^*} &= \frac{2p_{1,2}^* + p_{1,1}^*}{2p_{2,1}^* + p_{1,1}^*} \\ p_{1,0}^* + 2p_{2,0}^* + p_{2,1}^* &= p_{0,1}^* + 2p_{0,2}^* + p_{1,2}^* \end{aligned}$$

leading to the test statistics  $Y_1$  and  $Y_2$  in equations 5 and 6 above.

The second outgroup test ( $Y_2$ ) is similar to the D-test since the probability to draw the ancestral (single) allele from population 1 and the derived allele from population 2 is

$$p_{0,2}^* + \frac{1}{2}(p_{0,1}^* + p_{1,2}^*) + \frac{1}{4}p_{1,1}^*$$

and the probability to draw the derived allele from population 1 and the ancestral allele from population 2 is

$$p_{2,0}^* + \frac{1}{2}(p_{1,0}^* + p_{2,1}^*) + \frac{1}{4}p_{1,1}^*.$$

Similarly, for sites where the derived variant is observed in a sample of size 1 in the outgroup (note that our conditioning is different)

$$\begin{aligned} D &= \frac{\left(m_{0,2}^{**} + \frac{1}{2}(m_{0,1}^{**} + m_{1,2}^{**}) + \frac{1}{4}m_{1,1}^{**}\right) - \left(m_{2,0}^{**} + \frac{1}{2}(m_{1,0}^{**} + m_{2,1}^{**}) + \frac{1}{4}m_{1,1}^{**}\right)}{\left(m_{0,2}^{**} + \frac{1}{2}(m_{0,1}^{**} + m_{1,2}^{**}) + \frac{1}{4}m_{1,1}^{**}\right) + \left(m_{2,0}^{**} + \frac{1}{2}(m_{1,0}^{**} + m_{2,1}^{**}) + \frac{1}{4}m_{1,1}^{**}\right)} \\ &= 2 \frac{(m_{0,1}^{**} - m_{1,0}^{**}) + 2(m_{0,2}^{**} - m_{2,0}^{**}) + (m_{1,2}^{**} - m_{2,1}^{**})}{m_{1,1}^{**} + 2(m_{0,1}^{**} + m_{1,0}^{**}) + 4(m_{0,2}^{**} + m_{2,0}^{**}) + 2(m_{1,2}^{**} + m_{2,1}^{**})} \end{aligned}$$

where  $^{**}$  indicates sites where the derived variant is observed in a sample of size 1 in the outgroup (our conditioning is different). The nominator is very similar to the nominator in the second outgroup test ( $Y_2$  in equation 6 above).

### Assuming an ancestral population with no structure backwards in time

Define

$$T_{ki}$$

to be the number of generations a coalescent process that starts with  $k$  lineages at the (most recent) base of the ancestral population spends with  $i$  lineages (so that  $T_{mrca} = \sum_{i=k}^2 T_{ki}$ ). The probability that there are  $k$  derived variants in a sample of size  $n$  given that a mutation occurred when there were  $i$  lineages is (Slatkin 1996).

$$P(A_n = k | \text{mutation during } T_{n,i}) = \frac{\binom{n-k-1}{i-2}}{\binom{n-1}{i-1}}$$

implying that

$$\begin{aligned} P(A_n = k) &= \sum_{i=n}^2 P(A_n = k | \text{mutation during } T_{n,i}) P(\text{mutation during } T_{n,i}) \\ &= \sum_{i=n}^2 \frac{\binom{n-k-1}{i-2}}{\binom{n-1}{i-1}} \mu i E[T_{n,i}] \end{aligned}$$

We get

$$\begin{aligned} b_1 &= P(A_4 = 1) = \frac{2}{3} \mu E[T_{42}] + 2 \mu E[T_{43}] + 4 \mu E[T_{44}] \\ b_2 &= P(A_4 = 2) = \frac{2}{3} \mu E[T_{42}] + \mu E[T_{43}] \\ b_3 &= P(A_4 = 3) = \frac{2}{3} \mu E[T_{42}] \end{aligned}$$

1 **Picking two gene copies from population 1 and one gene copy from population 2**

Here, instead of two gene copies from both populations, the method assumes two sampled gene copies from population 1 and one sampled gene copy from population 2. The possible sample configurations are then:

**Table 3** Number of derived in the two samples.

|           | 0 in pop2 | 1 in pop2 |
|-----------|-----------|-----------|
| 0 in pop1 | $O_{0,0}$ | $O_{0,1}$ |
| 1 in pop1 | $O_{1,0}$ | $O_{1,1}$ |
| 2 in pop1 | $O_{2,0}$ | $O_{2,1}$ |

The observed number of sites with sample configuration  $O_{i,j}$  will be denoted by  $m_{i,j}$  and the total number of sites by  $m_{tot}$ . Assume independence between sites, an infinite sites model and a split model with no migration where the two daughter populations merge into a panmictic ancestral population and define the event

$H$ : a coalescent event in population 1 before  $t_1$  ( $P(H) = 1 - \alpha$ )

- 2 Also define  $A_k$  to be the number of derived variants in a (hypothetical) sample of size  $k$  drawn at the split time in the ancestral population. Writing  $a_{ki} = P(A_k = i)$ , the conditional probabilities for sample configurations  $O_{1,0}, \dots, O_{1,1}$  are as in table 4:

**Table 4** Conditional probabilities.

|           | $H$                                  | $\neg H$                       |
|-----------|--------------------------------------|--------------------------------|
| $O_{1,0}$ | $2\mu\nu$                            | $\frac{2}{3}a_{31} + 2\mu t_1$ |
| $O_{0,1}$ | $\frac{1}{2}a_{21} + \mu t_2$        | $\frac{1}{3}a_{31} + \mu t_2$  |
| $O_{2,0}$ | $\frac{1}{2}a_{21} + \mu(t_1 - \nu)$ | $\frac{1}{3}a_{32}$            |
| $O_{1,1}$ | 0                                    | $\frac{2}{3}a_{32}$            |

- 3 Since

$$a_{21} = P(A_2 = 1) = \frac{2}{3}a_{31} + \frac{2}{3}a_{32}$$



we write  $b_i = a_{3i} = P(A_3 = i)$  to get

$$\begin{aligned}
 p_{1,0} &= 2(1 - \alpha)\mu\nu + 2\alpha \left( \mu t_1 + \frac{1}{3}b_1 \right) \\
 p_{0,1} &= \frac{1}{3}(1 - \alpha)b_2 + \mu t_2 + \frac{1}{3}b_1 \\
 p_{2,0} &= (1 - \alpha) \left( \mu t_1 + \frac{1}{3}b_1 \right) - (1 - \alpha)\mu\nu + \frac{1}{3}b_2 \\
 p_{1,1} &= \frac{2}{3}\alpha b_2 \\
 p_{0,0} + p_{2,1} &= 1 - \sum_{0 < i+j < 3} p_{i,j}
 \end{aligned} \tag{9}$$

where  $p_{i,j} = P(O_{i,j})$ .

Similar to the case when two gene copies are picked from each sub-population: 1) it is not possible to completely separate  $b_1$  from divergence times due to the co-occurrence of  $b_1$  with  $\mu t_1$  and  $\mu t_2$ , 2) disregarding  $b_1$ , this is an underdetermined set of equations with 5 parameters but only 4 equations/degrees of freedom ( $p_{0,0} + p_{2,1} = 1 - \sum_{0 < i+j < 4} p_{i,j}$ ). Setting  $t_1 = t_2$  does not help since

$$p_{0,1} - p_{2,0} + \frac{1}{2}(p_{1,1} - p_{1,0}) = \mu(t_2 - t_1)$$

and thus reduces the number of independent equations. Assuming the model in figure 1b, does not reduce the number of parameters and does not help in this case.

If ascertainment is done in an outgroup

$$\begin{aligned}
 p_{1,0}^* &= \frac{2}{3}\alpha b_1^* \\
 p_{0,1}^* &= \frac{1}{3}(1 - \alpha)b_2^* + \frac{1}{3}b_1^* \\
 p_{2,0}^* &= \frac{1}{3}(1 - \alpha)b_1^* + \frac{1}{3}b_2^* \\
 p_{1,1}^* &= \frac{2}{3}\alpha b_2^*
 \end{aligned}$$

where '\*' indicates that these are the corresponding conditional parameters and probabilities. This can be solved to yield two estimates of  $\alpha$

$$\begin{aligned}
 \hat{\alpha}^* &= \frac{m_{1,0}^* + m_{1,1}^*}{2m_{0,1}^* + m_{1,1}^*} \\
 \hat{\alpha}^* &= \frac{m_{1,0}^* + m_{1,1}^*}{2m_{2,0}^* + m_{1,0}^*}
 \end{aligned}$$

and these two estimates can be compared to create the tests

$$\begin{aligned}
 \frac{m_{1,0}^* + m_{1,1}^*}{2m_{0,1}^* + m_{1,1}^*} - \frac{m_{1,0}^* + m_{1,1}^*}{2m_{2,0}^* + m_{1,0}^*} &= 0 \\
 2m_{0,1}^* - 2m_{2,0}^* + m_{1,1}^* - m_{1,0}^* &= 0
 \end{aligned}$$

of that ascertainment was performed in a true outgroup.

Assuming the model in figure 1a, then  $b_2 = \mu E[T_{32}]$  and  $b_1 = 3\mu E[T_{33}] + \mu E[T_{32}]$  and

$$\begin{aligned}
 p_{1,0} &= 2\alpha (\mu t_1 + \tau_3) + 2(1 - \alpha)\mu\nu + \frac{2}{3}\alpha\tau_2 \\
 p_{0,1} &= \mu t_2 + \tau_3 + \frac{1}{3}(2 - \alpha)\tau_2 \\
 p_{2,0} &= (1 - \alpha) (\mu t_1 + \tau_3) - (1 - \alpha)\mu\nu + \frac{1}{3}(2 - \alpha)\tau_2 \\
 p_{1,1} &= \frac{2}{3}\alpha\tau_2
 \end{aligned}$$

with  $\tau_3 = \mu E[T_{33}]$  and  $\tau_2 = \mu E[T_{32}]$ . If  $\alpha$  is given by  $\hat{\alpha}^*$ , we solve to get

$$\begin{aligned}\hat{\tau}_2 &= \frac{3}{2\hat{\alpha}^*} \frac{m_{1,1}}{m_{tot}} \\ \widehat{\mu t_1 + \tau_3} &= \frac{1}{m_{tot}} \left( m_{1,0} \frac{1}{2} + m_{2,0} - m_{1,1} \frac{1}{\hat{\alpha}^*} \right) \\ \widehat{\mu t_2 + \tau_3} &= \frac{1}{m_{tot}} \left( m_{0,1} - m_{1,1} \frac{2 - \hat{\alpha}^*}{2\hat{\alpha}^*} \right) \\ \widehat{\mu v} &= \frac{1}{m_{tot}} \left( m_{1,0} \frac{1}{2} - m_{2,0} \frac{\hat{\alpha}^*}{1 - \hat{\alpha}^*} + m_{1,1} \frac{1}{2(1 - \hat{\alpha}^*)} \right)\end{aligned}$$

In (Schlebusch *et al.* 2012) and (Skoglund *et al.* 2011),

$$\frac{3}{2} \frac{m_{1,1}}{m_{2,0} + m_{1,1}}$$

is used to estimate  $\alpha$ . A comparison to the framework presented here gives

$$\frac{3}{2} \frac{m_{1,1}}{m_{2,0} + m_{1,1}} = \frac{3}{2} \frac{p_{1,1}}{p_{2,0} + p_{1,1}} = \alpha \frac{b_2}{(1 - \alpha)\mu(t_1 - \nu) + \frac{1}{3}(1 - \alpha)b_1 + \frac{1}{3}(1 + 2\alpha)b_2}$$

which is approximately  $\alpha$  for  $\alpha$  close to 1 or if  $b_1 \approx 2b_2$  and either  $b_2 \gg (1 - \alpha)\mu(t_1 - \nu)$  or  $t_1 - \nu \approx 0$ .

Assuming a constant ancestral population size (figure 1b) implies  $b_1 = 2\mu N_A = 2b_2$  and

$$\frac{3}{2} \frac{p_{1,1}}{p_{2,0} + p_{1,1}} = \alpha \frac{N_A}{N_A + (1 - \alpha)(t_1 - \nu)}$$

which is approximately  $\alpha$  for  $\alpha$  close to 1, for  $N_A \gg (1 - \alpha)(t_1 - \nu)$  and for  $t_1 - \nu \approx 0$ .

If ascertainment is performed in an outgroup,

$$\frac{3}{2} \frac{m_{1,1}^*}{m_{2,0}^* + m_{1,1}^*} = \frac{3}{2} \frac{p_{1,1}^*}{p_{2,0}^* + p_{1,1}^*} = \alpha \frac{3b_2^*}{(1 - \alpha)b_1^* + (1 + 2\alpha)b_2^*}$$

which is approximately  $\alpha$  for  $\alpha$  close to 1 or if  $b_1^* \approx 2b_2^*$ .

## Supplemental Material

### Figures for simulation studies

1

2

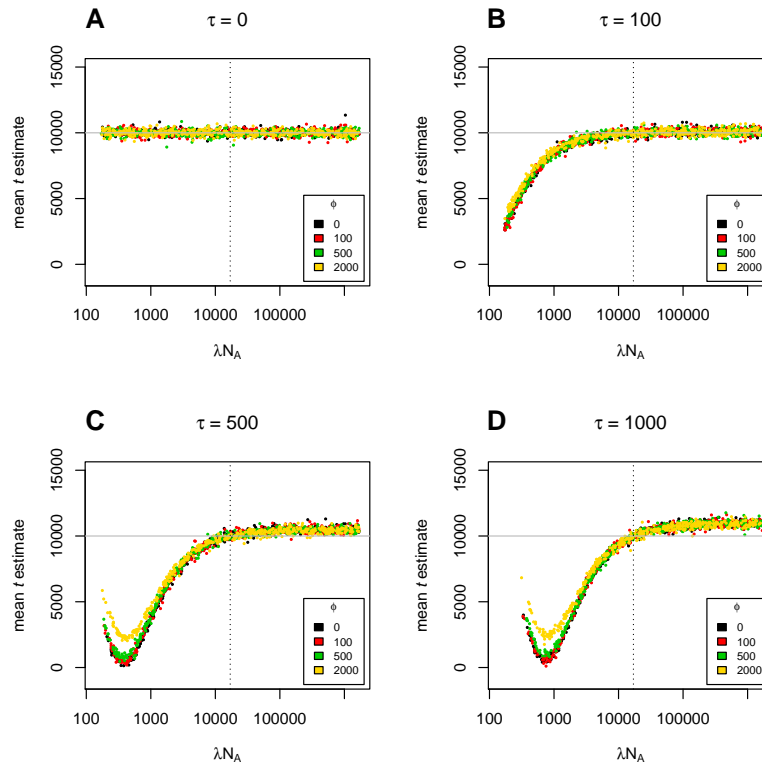

**Figure S1** The effect of ancestral population size change,  $\lambda N_A$ , on TT method estimates of divergence time,  $t$ , with a true split time of 10,000 generations and ancestral population size change lasting (A) 0, (B) 100, (C) 500, and (D) 1000 generations.

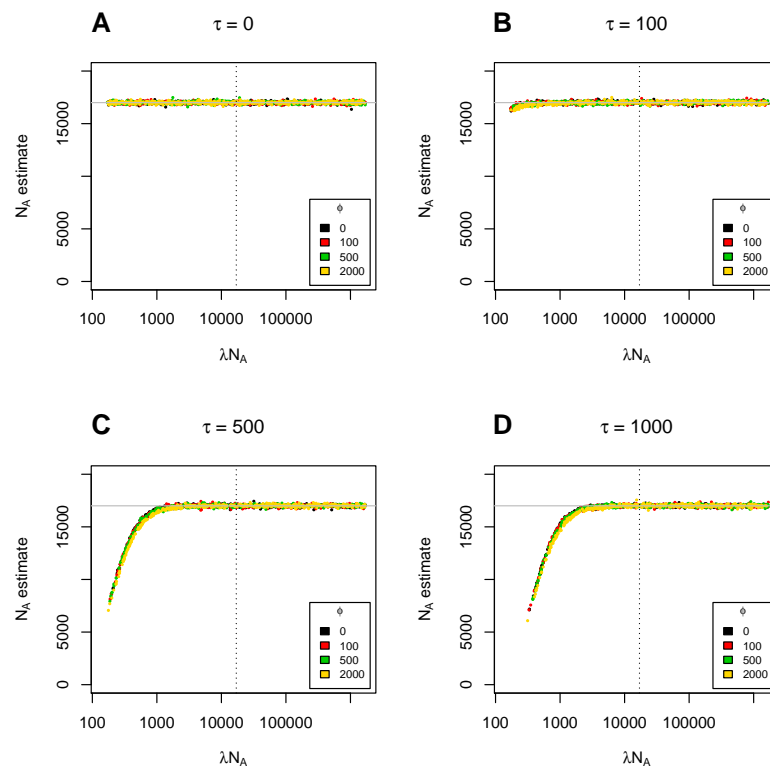

**Figure S2** The effect of ancestral population size change,  $\lambda N_A$ , on TT method estimates of ancestral population size,  $N_A$ , with a true split time of 10,000 generations and ancestral population size change lasting (A) 0, (B) 100, (C) 500, and (D) 1000 generations.

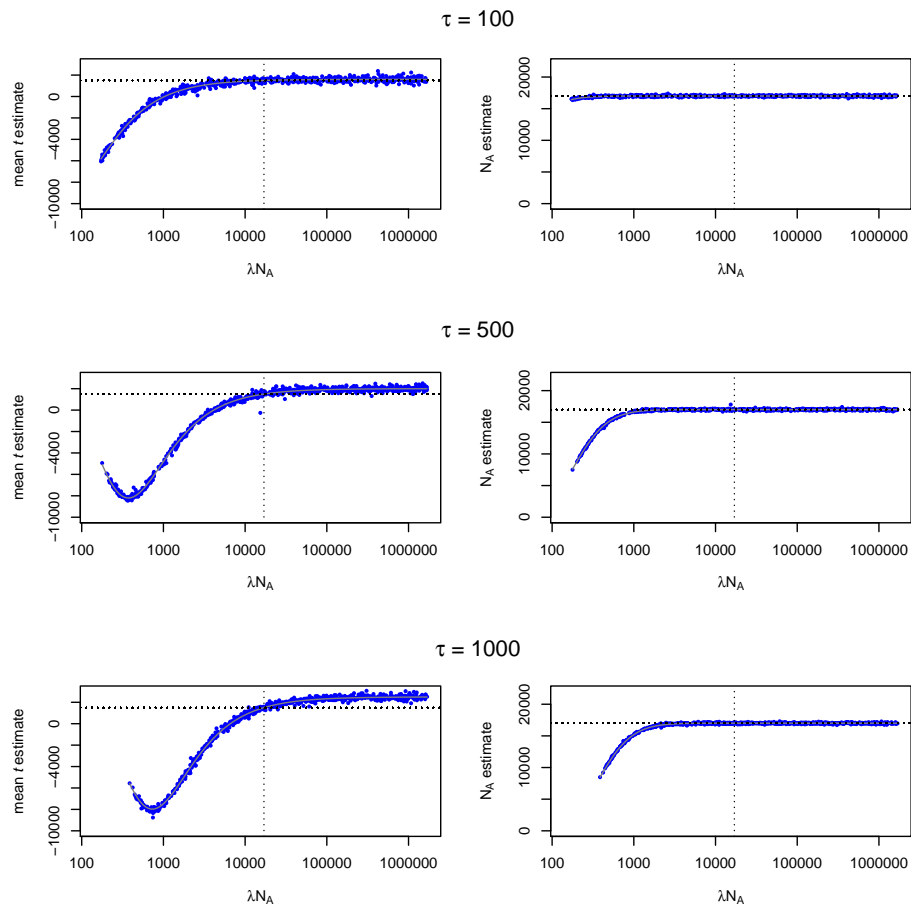

**Figure S3** TT method estimates of divergence time and ancestral population size with changes to ancestral population size of duration ( $\tau$ ) (A, B) 100, (C, D) 500, and (E, F) 1,000 generations. In all cases, the change in ancestral population size occurs immediately prior to the split ( $\phi=0$ ) and the true split time is 1500 generations.

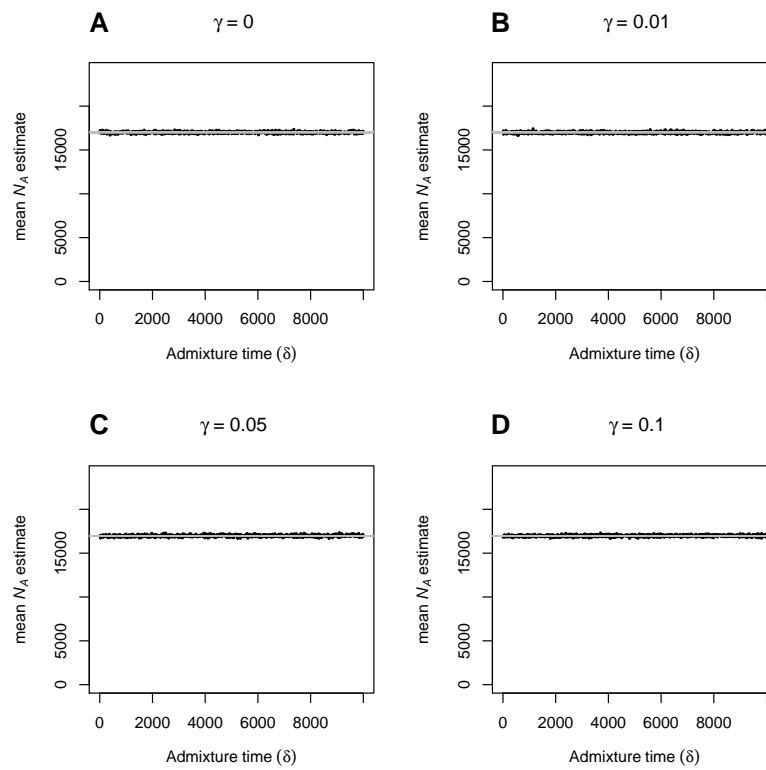

**Figure S4** The effect of varying admixture time ( $\delta$ ) on TT method estimates of ancestral population size ( $N_A$ ), with migration proportions ( $\gamma$ ) of (A) 0, (B) 0.01, (C) 0.05 and (D) 0.1 when true ancestral population size is 17,000 and true split time is 10,000 generations.

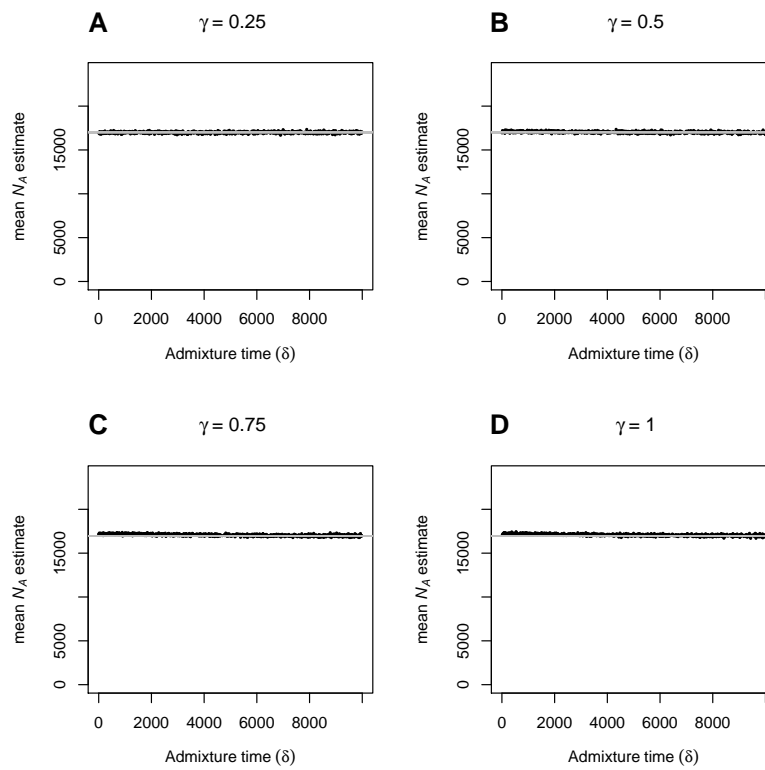

**Figure S5** The effect of varying admixture time ( $\delta$ ) on TT method estimates of ancestral population size ( $N_A$ ), with migration proportions ( $\gamma$ ) of (A) 0.25, (B) 0.5, (C) 0.75 and (D) 1 when true ancestral population size is 17,000 and true split time is 10,000 generations.

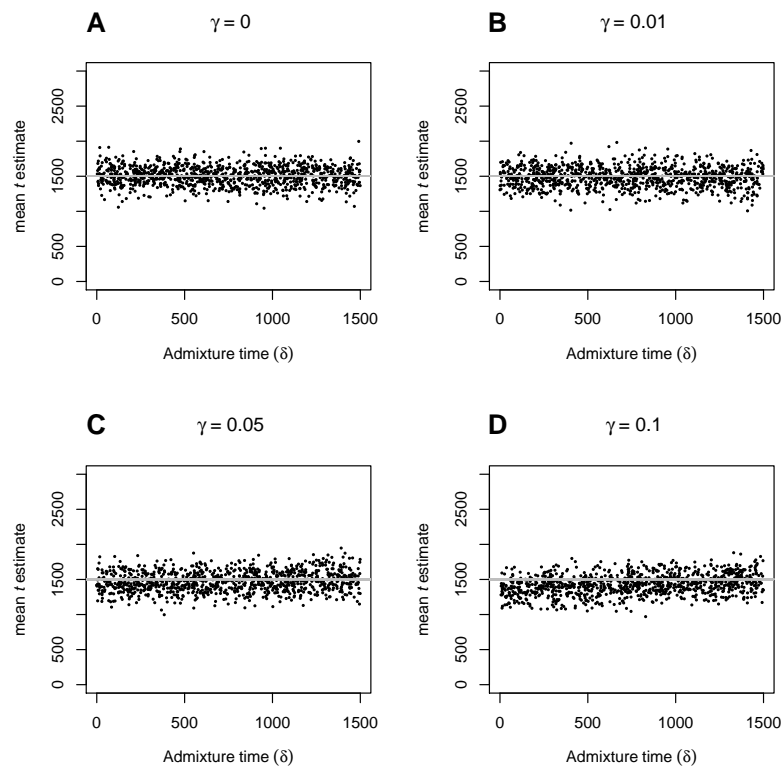

**Figure S6** The effect of varying admixture time ( $\delta$ ) on TT split time estimates ( $\hat{t}$ ), when the proportion of admixture ( $\gamma$ ) is (A) 0, (B) 0.01, (C) 0.05 and (D) 0.1, and true split time is 1500 generations.



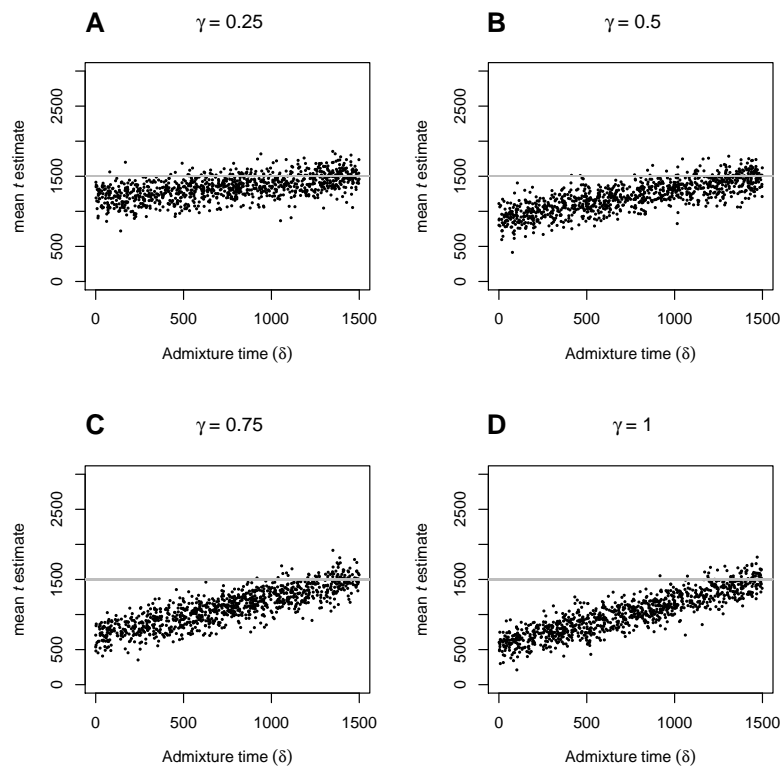

**Figure S7** The effect of varying admixture time ( $\delta$ ) on TT split time estimates ( $\hat{t}$ ), when the proportion of admixture ( $\gamma$ ) is (A) 0.25, (B) 0.5, (C) 0.75 and (D) 1, and true split time is 1500 generations.

1 **Figures for application to data**

2 ***TT-estimates under a constant ancestral population***

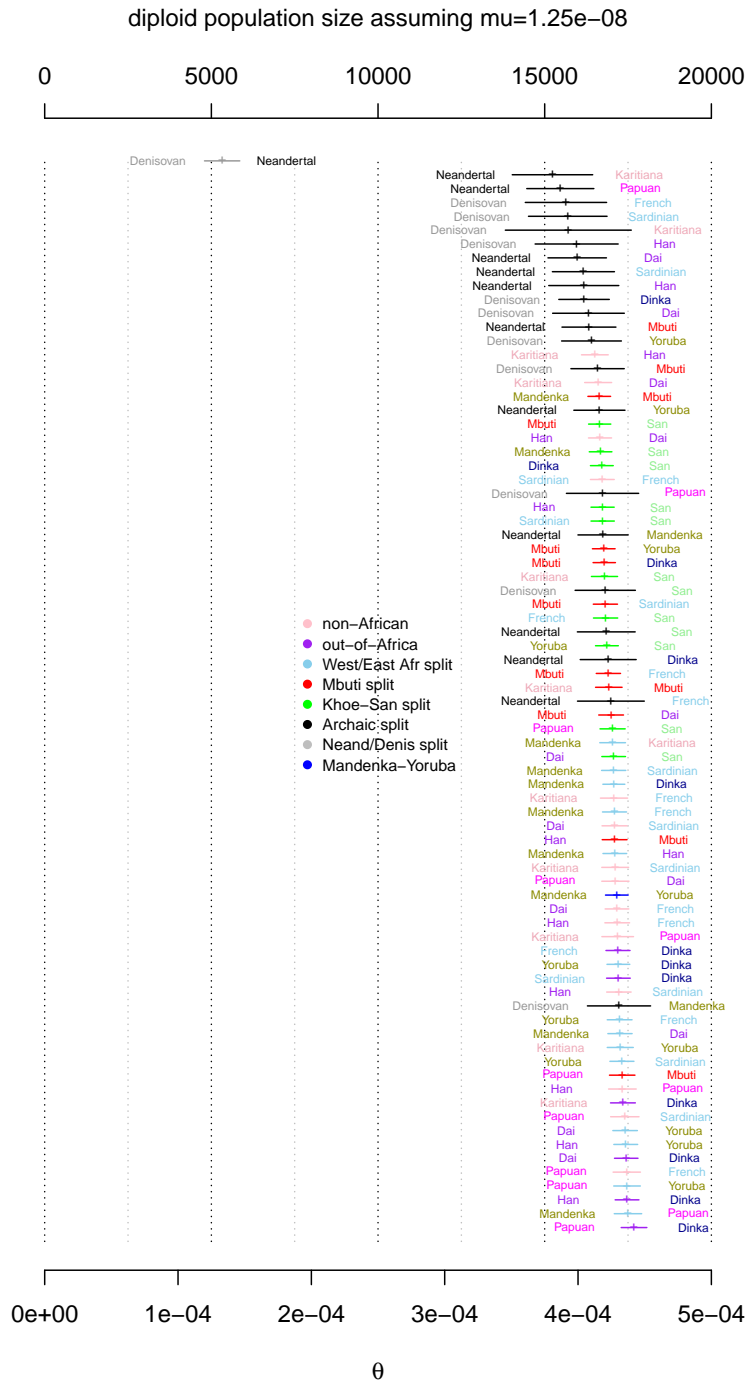

**Figure S8** Estimates of  $\theta = \mu N_A$  and the corresponding diploid ancestral population size ( $N_A/2$ ) assuming that it is constant and a mutation rate of  $1.25 \times 10^{-8}$ .

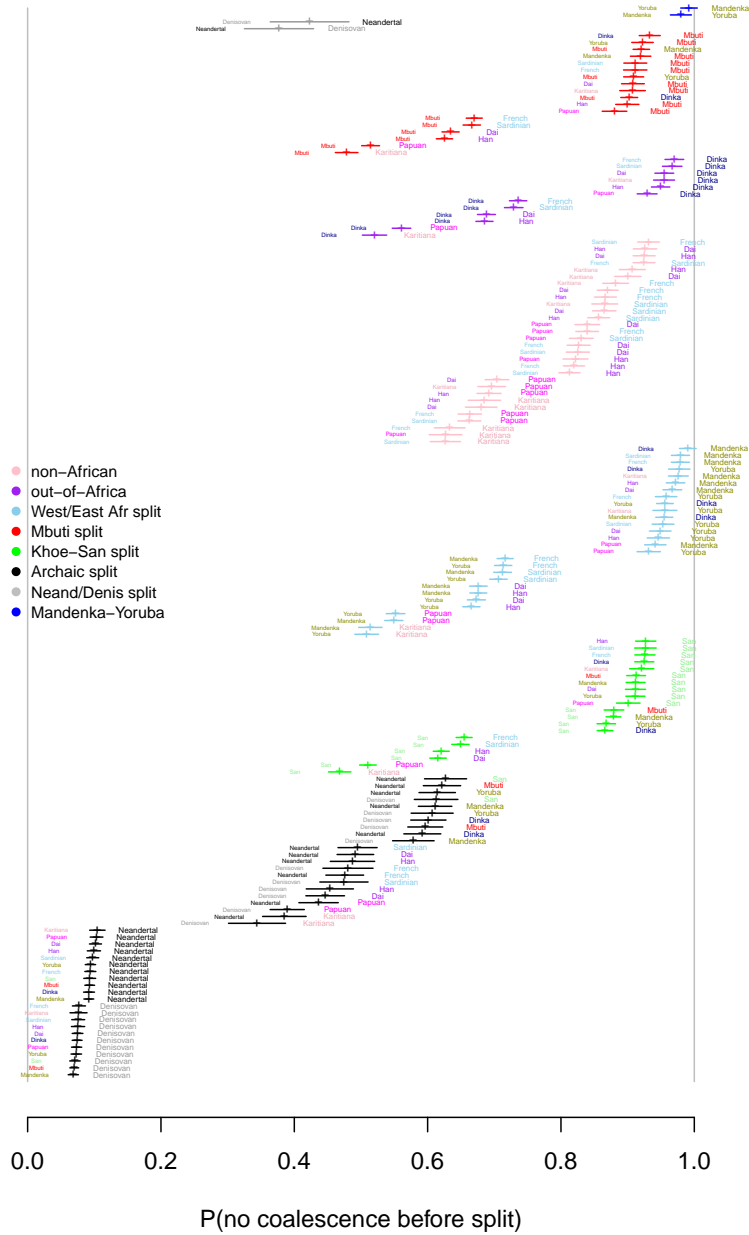

Figure S9 Estimates of  $\alpha$  assuming a constant ancestral population.

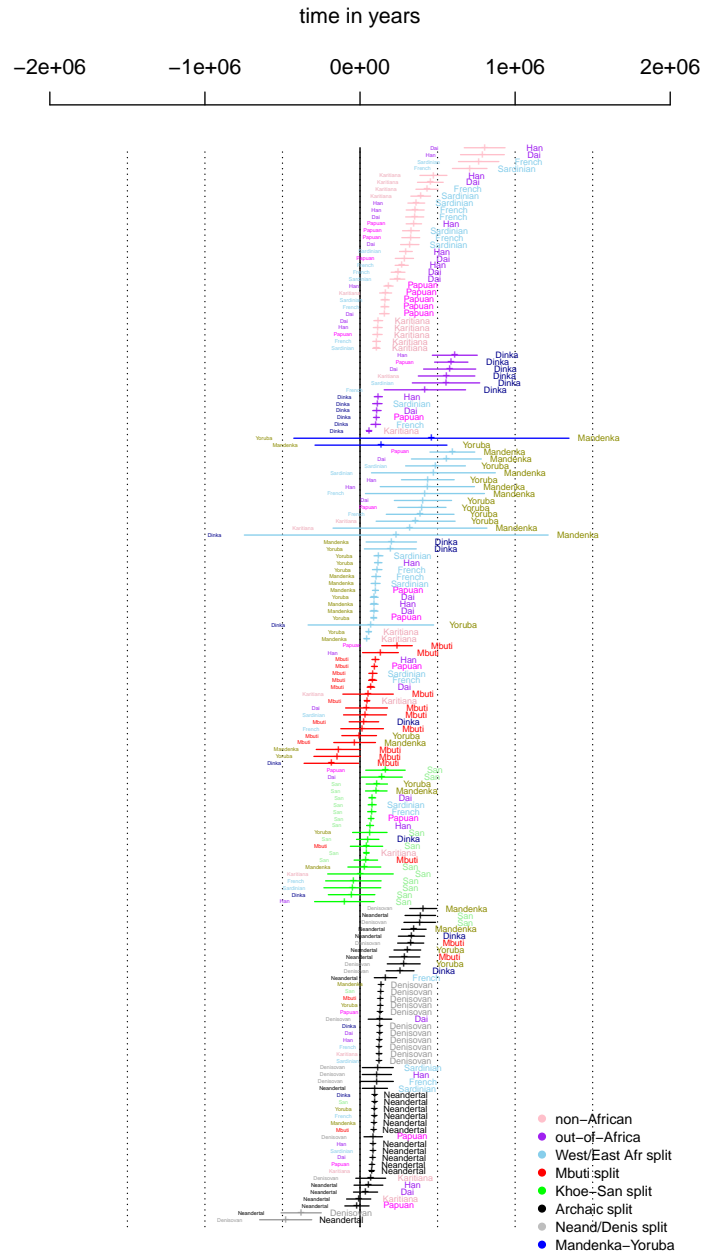

**Figure S10** Estimates of expected coalescence times in years given coalescence before split assuming a constant ancestral population. A mutation rate of  $1.25 \times 10^{-8}$  and a generation time of 30 years is assumed.

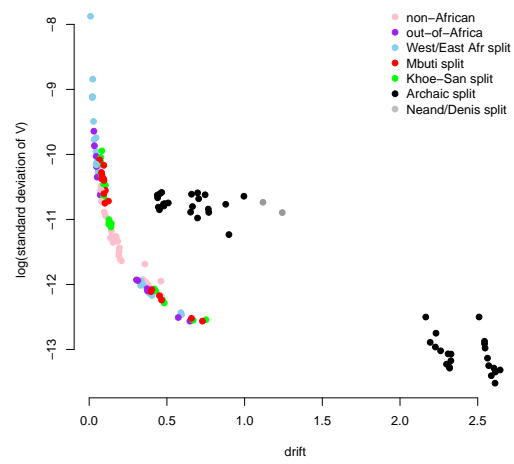

**Figure S11** Drift ( $-\ln(\alpha)$ ) vs estimated standard deviation of  $V = \mu v$ .

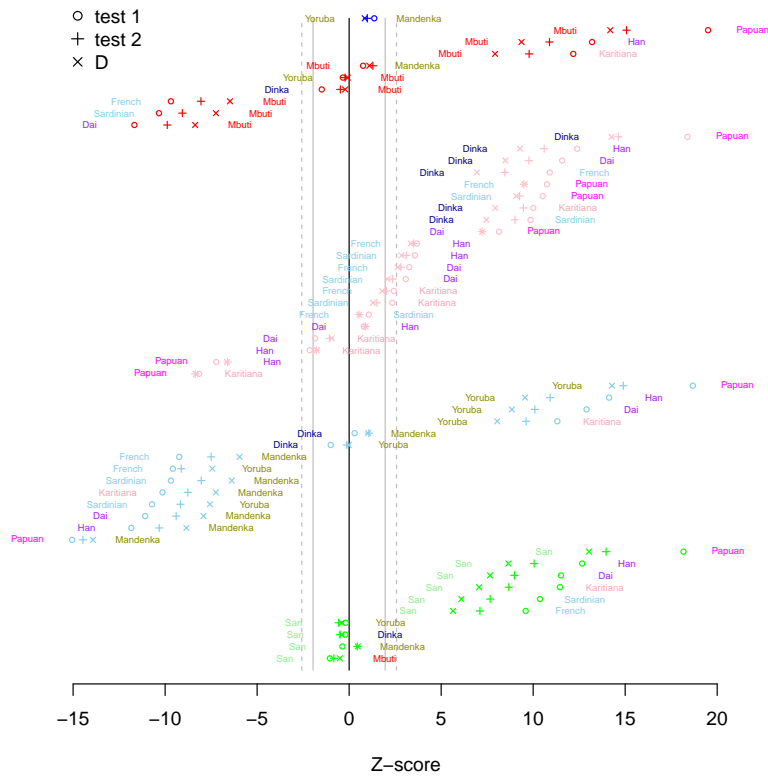

**Figure S12** Tests based on equation 5 (○) and equation 6 (+) when data is conditional on the derived variant being present in either the Neandertal or Denisovan genome. D-tests (scaled by its estimated standard deviation, ×) with D('left population', 'right population', Neandertal+Denisovan, outgroup) are also shown. Solid grey lines shows cut-offs for rejecting null-model at the 0.05 level and the dashed lines at the 0.01 level.

1 *TT-estimates using outgroup ascertainment*

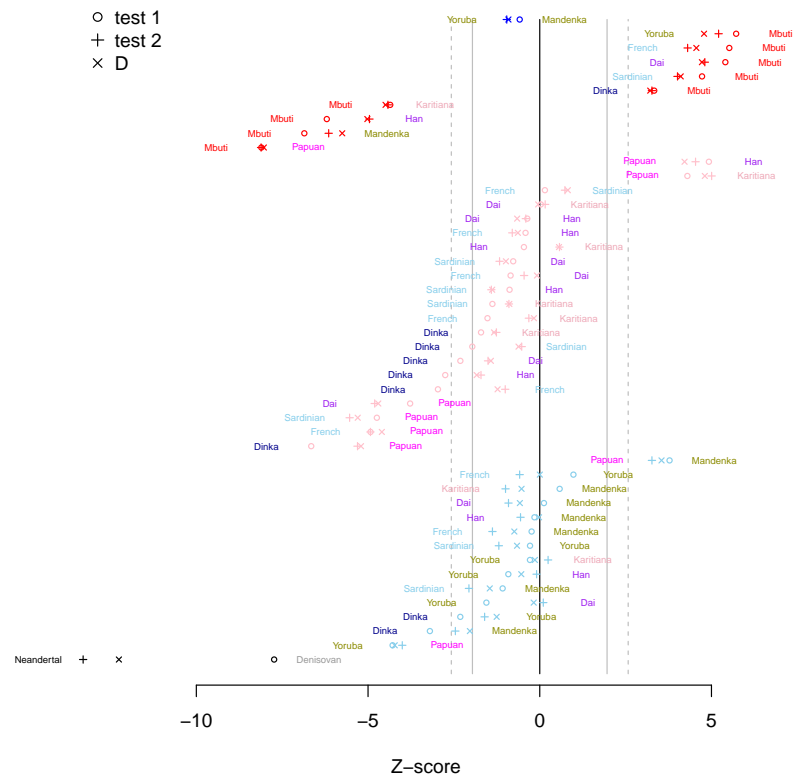

**Figure S13** Tests based on equation 5 (○) and equation 6 (+) when data is conditional on the derived variant being present in Balito Bay A. D-tests (scaled by its estimated standard deviation, ×) with D('left population', 'right population', Balito Bay A, outgroup) are also shown. Solid grey lines shows cut-offs for rejecting null-model at the 0.05 level and the dashed lines at the 0.01 level.

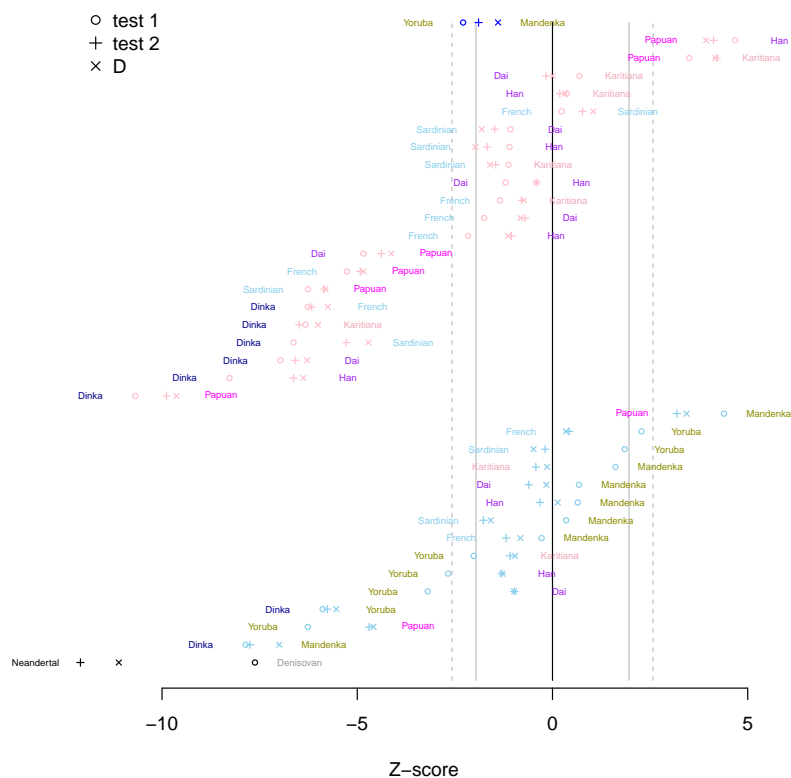

**Figure S14** Tests based on equation 5 (○) and equation 6 (+) when data is conditional on the derived variant being present in Mbuti. D-tests (scaled by its estimated standard deviation, ×) with D('left population', 'right population', Mbuti, outgroup) are also shown. Solid grey lines shows cut-offs for rejecting null-model at the 0.05 level and the dashed lines at the 0.01 level.



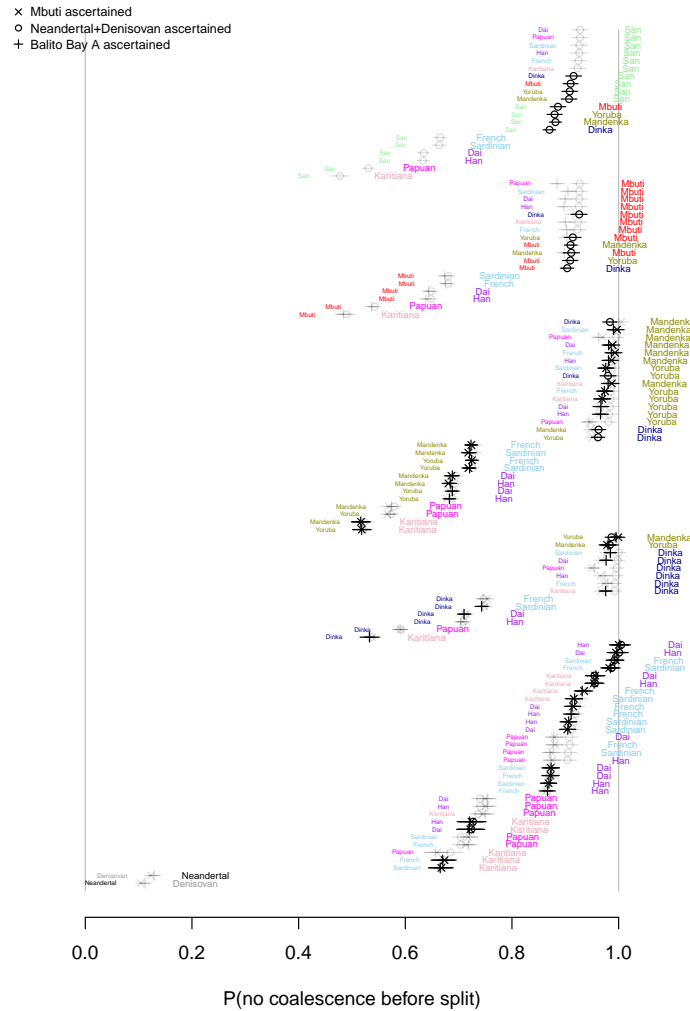

**Figure S15**  $\alpha$ -estimates conditional on the derived variant being present in the outgroup. ‘Cross’ show estimates when the derived variant is present in Mbuti, ‘circle’ show estimates when the derived variant is present in Neandertal or Denisovan, ‘plus’ show estimates when the derived variant is present in Balito Bay A. Black was used for estimates that did not fail the outgroup tests while transparent grey was used for comparisons that failed at least one of the two outgroup tests.

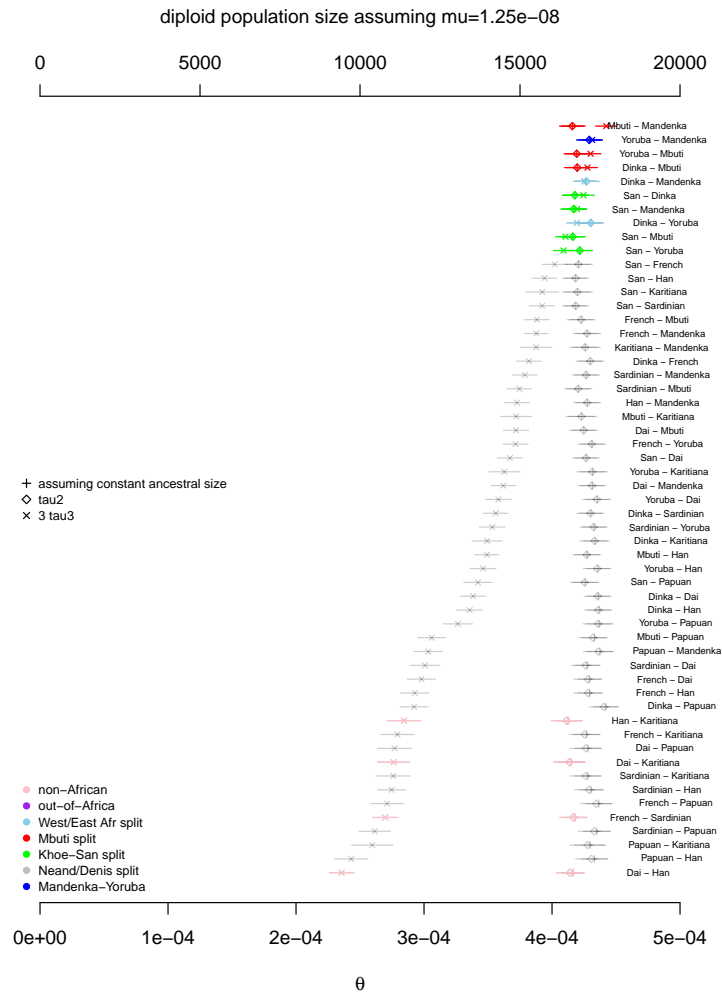

**Figure S16** Different estimates of the ancestral population size. Here Neandertal+Denisovan was used as outgroup to estimate  $\tau_2$  and  $\tau_3$ . Transparent grey was used for comparisons that failed at least one of the two outgroup tests.

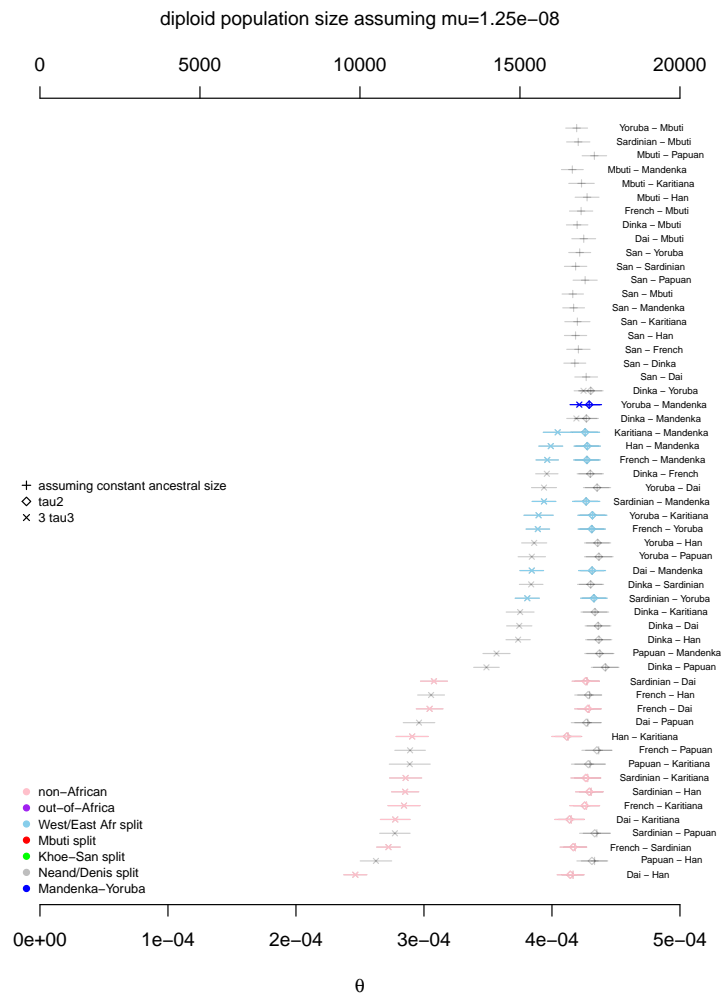

**Figure S17** Different estimates of the ancestral population size. Here Mbuti was used as outgroup to estimate  $\tau_2$  and  $\tau_3$ . Transparent grey was used for comparisons that failed at least one of the two outgroup tests.

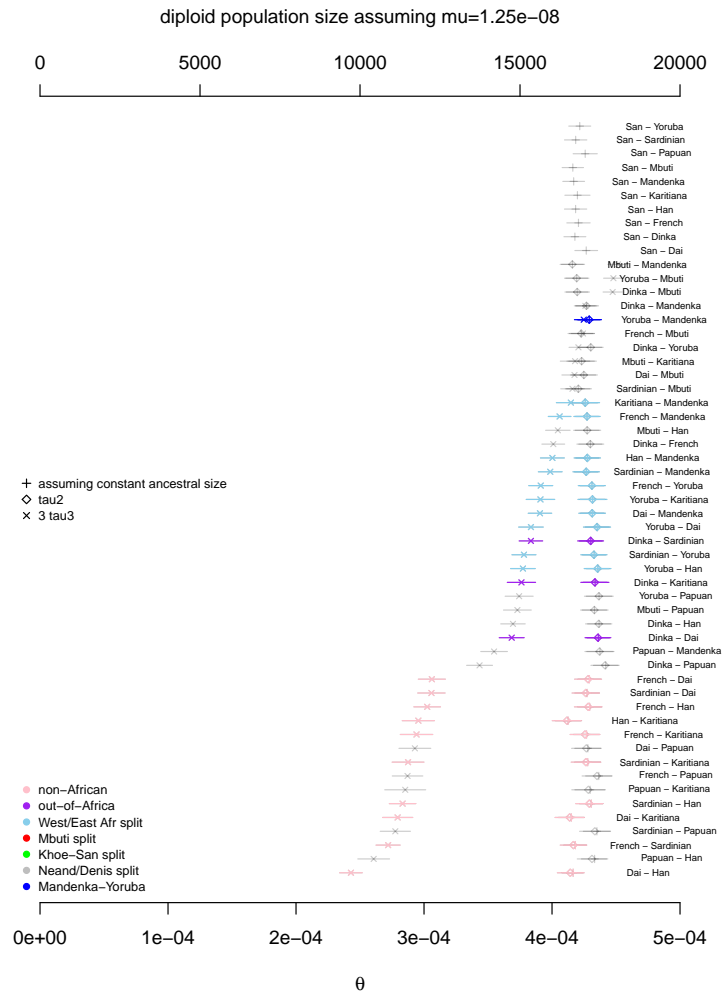

**Figure S18** Different estimates of the ancestral population size. Here Balito Bay A was used as outgroup to estimate  $\tau_2$  and  $\tau_3$ . Transparent grey was used for comparisons that failed at least one of the two outgroup tests.

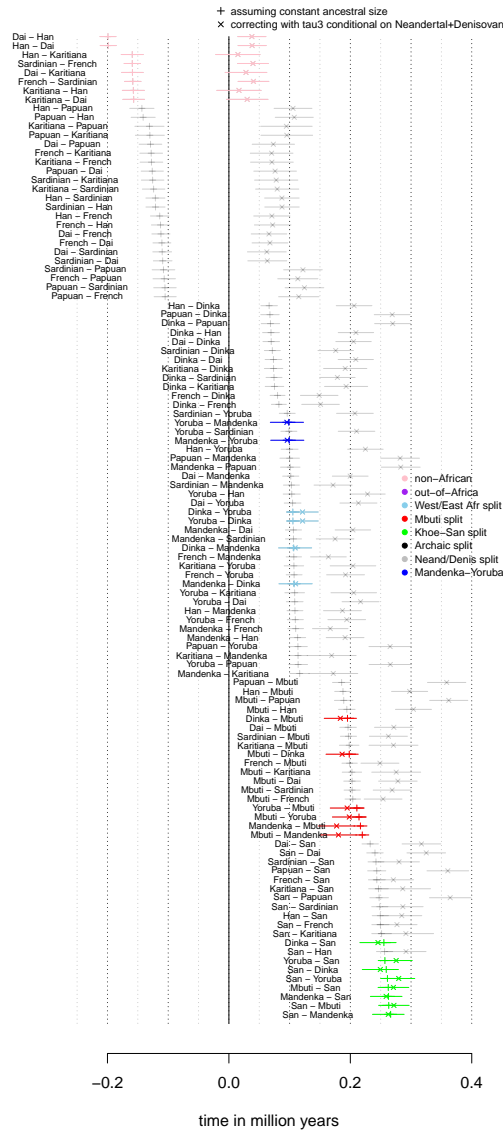

**Figure S19** Different estimates of split times assuming a mutation rate of  $1.25 \times 10^{-8}$  and a generation time of 30 years. Two estimates are shown: estimates assuming a constant ancestral (+) and estimates relying on an external estimate of  $\alpha$  (x) obtained by outgroup ascertainment in Neandertal+Denisovan. Transparent grey was used for comparisons that failed at least one of the two outgroup tests.

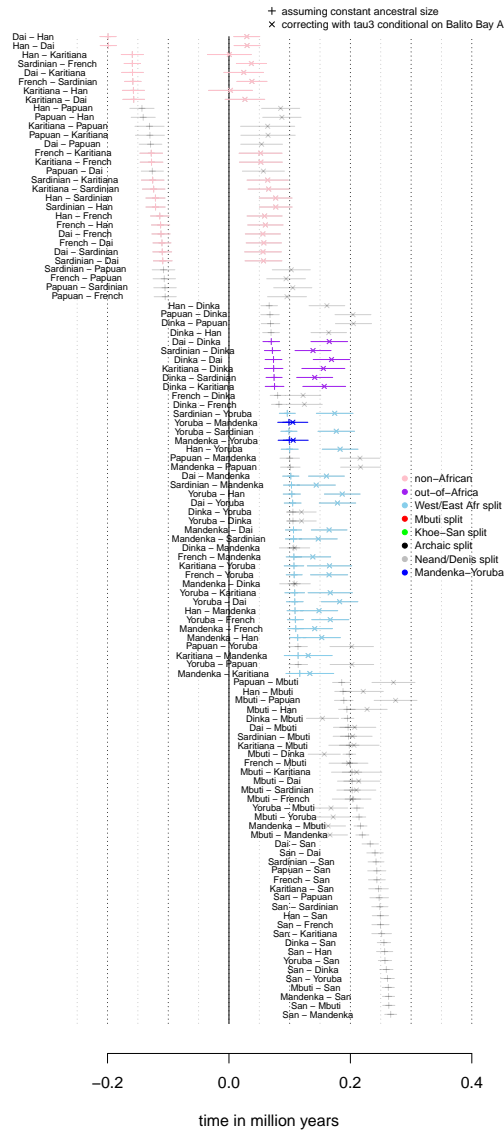

**Figure S20** Different estimates of split times assuming a mutation rate of  $1.25 \times 10^{-8}$  and a generation time of 30 years. Two estimates are shown: estimates assuming a constant ancestral (+) and estimates relying on an external estimate of  $\alpha$  (x) obtained by outgroup ascertainment in Balito Bay A (an ancient Khoe-San genome). Transparent grey was used for comparisons that failed at least one of the two outgroup tests.

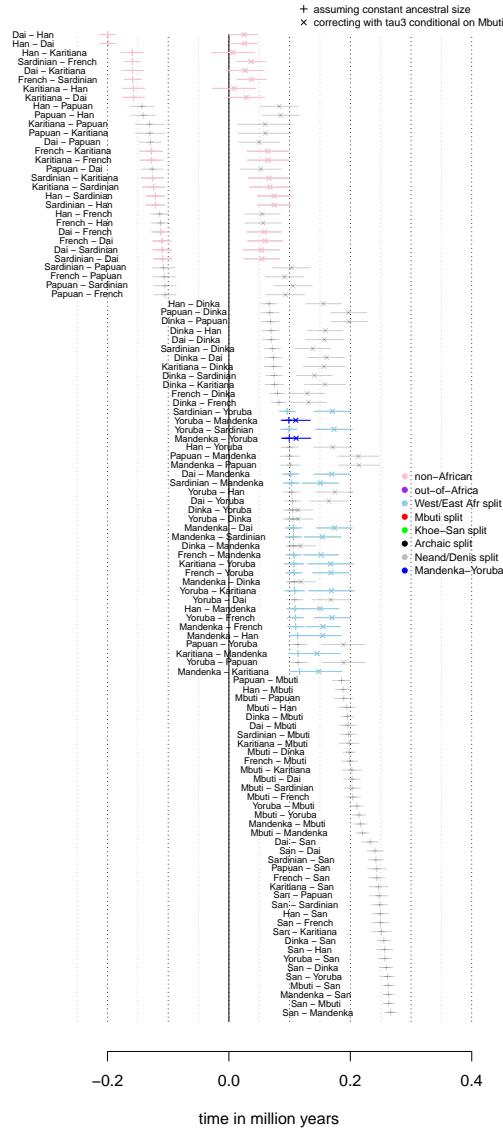

**Figure S21** Different estimates of split times assuming a mutation rate of  $1.25 \times 10^{-8}$  and a generation time of 30 years. Two estimates are shown: estimates assuming a constant ancestral (+) and estimates relying on an external estimate of  $\alpha$  (x) obtained by outgroup ascertainment in Mbuti. Transparent grey was used for comparisons that failed at least one of the two outgroup tests.
